1 **Rap-protein paralogs of *B. thuringiensis*: a multifunctional and redundant regulatory**  
2 **repertoire for the control of collective functions.**

3

4 **Gabriela Gastélum<sup>a,b</sup>, Mayra de la Torre<sup>a,b</sup>, Jorge Rocha<sup>c</sup>#**

5 <sup>a</sup> Centro de Investigación y Desarrollo en Agrobiotecnología Alimentaria, San Agustín  
6 Tlaxiaca, Hidalgo, Mexico.

7 <sup>b</sup> Food Science Department, Centro de Investigación en Alimentación y Desarrollo A.C.,  
8 Hermosillo, Sonora, Mexico.

9 <sup>c</sup>CONACYT - Centro de Investigación y Desarrollo en Agrobiotecnología Alimentaria, San  
10 Agustín Tlaxiaca, Hidalgo, Mexico.

11

12 Running Head: Control of collective functions by Rap proteins in Bt

13 # Address correspondence to Jorge Rocha, [Jorge.rocha@ciad.mx](mailto:Jorge.rocha@ciad.mx)

14

15 **Data Deposition Statement:** Analysis scripts and input files associated with reconstruction  
16 of the phylogenetic tree are available at [https://github.com/gabygal6/rap\\_phylogenetics](https://github.com/gabygal6/rap_phylogenetics)

17

18 A file with supplemental material is available.

19

20 **Abstract**

21 Quorum Sensing (QS) are mechanisms of synthesis and detection of signaling molecules to  
22 regulate gene expression and coordinate behaviors in bacterial populations. In *Bacillus*  
23 *subtilis* (Bs), multiple paralog Rap-Phr QS systems (receptor-signaling peptide) are highly

24 redundant and multifunctional, interconnecting the regulation of differentiation processes  
25 such as sporulation and competence. However, their functions in the *B. cereus* group are  
26 largely unknown. We evaluated the diversification of Rap-Phr systems in the *B. cereus*  
27 group as well as their functions, using *Bacillus thuringiensis* Bt8741 as model. Bt8741  
28 codes for eight Rap-Phr systems; these were overexpressed to study their participation in  
29 sporulation, biofilm formation, extracellular proteolytic activity and spreading. Our results  
30 show that two Rap-Phr systems (RapK and RapF) inhibit sporulation, probably through  
31 dephosphorylation of Spo0F; these two Raps also inhibit biofilm formation. Five systems  
32 (RapC, F, F2, I1 and RapLike) decrease extracellular proteolytic activity; finally, four  
33 systems (RapC, F1, F2 and RapLike) participate in spreading inhibition. Our bioinformatic  
34 analyses showed that Rap proteins from the *B. cereus* group diversified into five  
35 pherogroups, and we foresee that functions performed by Rap proteins of Bt8741 could  
36 also be carried out by Rap homologs in other species within the group. These results  
37 indicate that Rap-Phr systems constitute a highly multifunctional and redundant regulatory  
38 repertoire that enable bacteria from the *B. cereus* group to efficiently regulate collective  
39 functions during the bacterial life cycle, in the face of changing environments.

40

#### 41 **Importance**

42 The *Bacillus cereus* group of bacteria includes species of high economic, clinical,  
43 biological warfare and biotechnological interest, e.g. *B. anthracis* in bioterrorism, *B.*  
44 *cereus* in food intoxications and *B. thuringiensis* in biocontrol. Knowledge on the ecology  
45 of these bacteria is hindered due to our limited knowledge of the regulatory circuits that  
46 control differentiation and specialization processes. Here, we uncover the participation of  
47 eight Rap quorum-sensing receptors in collective functions of *B. thuringiensis*. These

48 proteins are highly multifunctional and redundant in their functions, linking ecologically  
49 relevant processes such as sporulation, biofilm formation, extracellular proteolytic activity  
50 and spreading, and probably other additional functions in species from the *B. cereus* group.

51

## 52 **Introduction**

53 Bacteria perform many functions that depend on multicellular-like behaviors, such as cell  
54 differentiation and specialization. These behaviors, also known as collective functions,  
55 allow the emergence of complex ecological interactions, including cooperation and division  
56 of labor in biofilms (1, 2). Collective functions are only evident and effective when  
57 performed by large groups in bacterial populations or communities (3–6). Some of the most  
58 studied examples include bioluminescence by the squid symbiont *Vibrio fischeri* (7), or  
59 fruiting body formation during sporulation of *Myxococcus xanthus* (8).

60

61 In gram positive bacteria, collective functions and the molecular mechanisms for their  
62 control have been widely studied in *Bacillus subtilis* (Bs). In Bs cultures, several mutually-  
63 exclusive cell-types have been identified (motile, competent, sporulating, cannibal, biofilm  
64 matrix producers, surfactant producers and miners (9, 10)), where emerging ecological  
65 interactions such as cooperation, cheating and cross-feeding, have been described (5, 6, 11).  
66 The presence of these cell differentiation phenomena and the resulting ecological  
67 interactions, ultimately affect the manifestation of collective traits such as sporulation  
68 efficiency, surface colonization, biofilm architecture complexity, etc. (2, 9, 12). These  
69 phenomena depend on global modifications of transcriptional regulation; they are triggered  
70 by environmental cues, stress conditions, cell-cell signaling, and are tightly modulated by  
71 complex, overlapping regulatory circuits (13–15).

72

73 Bacteria detect cell density through quorum sensing (QS), which depends on self-produced  
74 signaling molecules that accumulate in the extracellular space as the population grows.  
75 Specific receptors in the cell membrane or in the cytoplasm recognize these signaling  
76 molecules and regulate downstream cellular processes (16–18). Collective traits such as  
77 virulence, competence, sporulation and bioluminescence are regulated by QS. Gram-  
78 positive bacteria use small peptides as signaling molecules for QS (17).

79

80 The RRNPP family (Rgg, Rap, NprR, PlcR, PrgX) are intracellular QS receptors that  
81 regulate several functions across gram-positive bacteria (19–21). Genes coding for receptor  
82 proteins and their associated signaling peptides are encoded in transcriptional cassettes (22).  
83 Rgg, NprR, PlcR and PrgX proteins are transcriptional activators that bind directly to DNA  
84 in quorum state. Rap proteins, however, lack a DNA binding domain and they function by  
85 binding and inhibiting proteins, specifically response regulators and transcriptional  
86 activators (21, 23, 24). Twelve Rap paralogs (RapA, B, C, D, E, F, G, H, I, J, K, 60) control  
87 diverse functions in *B. subtilis* 168 (Bs168). The RapG-PhrG pair regulates the activation  
88 of DegU, a transcriptional regulator that controls *aprE* and *comK* genes encoding for  
89 extracellular proteases and a transcription factor for competence in Bs, respectively (15, 25);  
90 ComA – the master regulator of competence genes – is repressed by RapC, D, F, G, H, K  
91 and Rap60 (14, 26–31); Spo0A – the transcriptional activator of many differentiation genes  
92 – is indirectly regulated by RapA, B, E, H, J, and Rap60 (24, 31–35). Hence, Rap protein  
93 paralogs from Bs are highly multifunctional and redundant and they connect several  
94 differentiation processes and coordinate collective traits.

95

96 Spo0A is activated by phosphorylation through a multicomponent phosphorelay system. Up  
97 to five kinases auto-phosphorylate in response to intracellular and environmental stress  
98 signals and transfer the phosphate group to Spo0F, which is then transferred to Spo0B and  
99 finally to Spo0A (36). Spo0A-P activates the transcription of multiple genes, including  
100 biofilm formation (at low concentrations) and early sporulation genes (at high  
101 concentrations (13)). Rap QS proteins prevent the phosphate transfer in the phosphorelay  
102 by binding to Spo0F (32, 37).

103

104 While the regulation of collective traits in Bs is well known, these phenomena remain  
105 largely understudied in the *B. cereus* group, which includes bacteria with clinical and  
106 biotechnological relevance (38). Although Bs and *B. cereus* group species share similar  
107 characteristics such as the sporulation process, the Spo0A phosphorelay components, and  
108 have many protein families in common, they also have notorious genetic differences (39).  
109 In *B. thuringiensis* (Bt, the most widely used biopesticide), the Spo0A phosphorelay is  
110 modulated by the bifunctional QS receptor NprR, which is not present in Bs (40–42). On  
111 the other hand, ComA and DegU response regulators are not present in Bt. Additionally,  
112 Rap-Phr QS systems also differ in both groups. These QS systems have evolved by  
113 duplication and divergence mechanisms; even though multiple Rap proteins paralogs are  
114 also found *B. cereus* group species, they have evolved independently and no Rap homologs  
115 are shared between the two groups (43, 44). Therefore, it is not possible to predict the  
116 functions of Rap proteins in the *B. cereus* group based on what is known of Rap proteins  
117 from Bs.

118

119 Some Rap-Phr systems from species of the *B. cereus* group have been studied. First, Rap  
120 BXA0205 and BA3790 from *B. anthracis* str. A2012, were demonstrated to regulate  
121 sporulation initiation and to dephosphorylate Spo0F (45). Later, it was shown that Rap8  
122 from Bt-HD73, regulates the sporulation and biofilm formation processes *in vitro* (46). A  
123 more recent study showed the participation of Rap6, 7 and 8 – also known as RapC, K and  
124 RapF, respectively (47) – in the modulation of the sporulation process in Bt407 (48).  
125 However, other Rap paralogs with unknown functions have been identified in the genomes  
126 of *B. cereus* group bacteria (44, 47) and they may be relevant to their ecology.

127

128 In this study we aimed at evaluating the diversification of the Rap-Phr systems in the *B.*  
129 *cereus* group as well as their functions, using *Bacillus thuringiensis* Bt8741 as a model. We  
130 generated eight Rap-overexpression strains of Bt8741 to evaluate the role of each Rap  
131 paralog in sporulation efficiency, biofilm formation, extracellular proteolytic activity and  
132 spreading. We also studied the evolution of Rap-Phr paralogs in the *B. cereus* group, by  
133 identifying Rap homologs from other species and analyzing its phylogeny. This allowed the  
134 prediction of their functions, based on those of Rap proteins from Bt.

135

## 136 **Results**

### 137 **Spo0F-binding residues from Bs RapH are conserved in Rap proteins from Bt8741.**

138 In order to predict the capacity of Rap proteins from Bt407 (a strain closely related to  
139 Bt8741) to bind to Spo0F, we analyzed the conservation of the amino acids previously  
140 reported to be involved in Spo0F-binding by RapH from *B. subtilis*. In this analysis, we  
141 included reported sequences of Bs-Rap proteins that bind to Spo0F (RapA, B, E, H, J) as  
142 well as the sequence of RapD from Bs, which does not bind to Spo0F (34) (Fig. 1). We

143 found higher percentage of conservation of the functional amino acids of RapH, in the  
144 sequences of both Bs168 and Bt407, compared to the corresponding complete sequences  
145 (Fig. 1B). In Bs168 the full sequence conservation of the Spo0F binding Raps (RapA, B, E,  
146 J) compared to RapH, ranges from 59% to 66% and the functional amino acids  
147 conservation percentage from 82.3% to 100%. In RapD, the full-length sequence is  
148 conserved at 50% and functional residues are only 64.7% conserved (Fig. 1B). In the case  
149 of Rap proteins from Bt407, the full sequence conservation in comparison to RapH of  
150 Bs168 ranged from 45% to 48%. On the other hand, conservation of functional residues  
151 ranged from 64.7% to 88.2% (Fig 1B). This indicates that the analyzed residues are  
152 important for the function of Bt Rap proteins.

153

154 RapK presented the highest conservation percentage of functional residues (88.2%),  
155 followed by RapF, I and RapI1 (82.3%), RapF1, F2 and RapLike (70.5%) and finally RapC  
156 with 64.6%. Although RapF1 and RapF2 presented a high conservation of functional  
157 residues, these Rap paralogs, as well as RapC, do not conserve the residue Q47 found in the  
158 catalytic site and previously shown to be essential for the phosphatase activity of RapH (34).  
159 This analysis enables the prediction that some Rap protein paralogs from Bt8741, with a  
160 high conservation percentage of functional amino acids, could dephosphorylate Spo0F,  
161 while other paralogs could have evolved to participate in other regulatory processes. Indeed,  
162 RapK, RapF, and unexpectedly RapC from Bt407, Rap8 from Bt-HD73 (ortholog to RapI  
163 from Bt407) and Rap BXA0205 and BA3790 from *B. anthracis*, (homologs of RapK and  
164 RapF2, respectively) have been shown to participate in the modulation of sporulation (45,  
165 46, 48). Previous to this work, RapF1, I1, and RapLike from Bt407 (or its homologs in  
166 other species), had not been tested for their role in sporulation.

167

168 **RapC, K, F and RapLike control sporulation in Bt8741.**

169 We constructed nine Rap-overexpression strains in the Bt8741 background (Table S1), one  
170 for each endogenous Rap protein identified in Bt407 (RapC, K, F, F1, F2, I, I1, Like) and  
171 one more for RapA from Bs168 (RapA<sub>Bs</sub>). We also generated a control strain of Bt8741  
172 carrying the empty plasmid pHT315-P<sub>xyIA</sub> (Table S1). DNA sequencing showed correct, in-  
173 frame insertion of P<sub>xyIA</sub> and *rap* genes in the pHT315 plasmid (not shown). We followed a  
174 growth time-course experiment of all strains in shaking flasks for 24 hours and confirmed  
175 that neither xylose addition, nor Rap overexpression, affected bacterial growth (Fig. S1).

176

177 In order to identify the Rap proteins involved in the regulation of the sporulation initiation,  
178 we studied the effect of the overexpression in the sporulation efficiency of each strain. In  
179 this experiment, we observed that both addition of xylose to the culture medium and the  
180 presence of *rap* genes in the plasmid had minor effects on total and thermoresistant CFU  
181 counts of Bt8741 at 72 h. In the control strain, addition of xylose caused a decrease of  $\approx 1$   
182 log<sub>10</sub> in total and thermoresistant CFU (Fig. S2A and S2B). Similarly, when *rapF1* and  
183 *rapF2* genes were carried in the plasmid – but not overexpressed – total CFU decreased by  
184 up to one logarithm of CFU in comparison to the control strain (Fig. S2A). Additionally,  
185 sporulation decreased one logarithm in strains carrying *rapF1*, *rapF2* and *rapI1* in  
186 comparison to the control strain when Rap was not overexpressed (Fig. S2C). These  
187 unspecific effects were probably related to basal expression from the P<sub>xyIA</sub> promoter, even  
188 when xylose is not added, since pHT315 replicates at 15 copies per cell (49). Finally, the  
189 most dramatic effect was found in thermoresistant CFU of strains that overexpressed Rap  
190 proteins (Fig. S2D).



191

192 In spite of unspecific effect of xylose addition on growth and sporulation, sporulation  
193 efficiency of the control strain remained unchanged by the addition of inducer (Fig. 2). In  
194 contrast, overexpression of RapA<sub>Bs</sub> caused a decrease in sporulation efficiency from 7.9%  
195 to 0.0005%. In fact, thermoresistant CFU were undetectable when RapA<sub>Bs</sub> was  
196 overexpressed (Fig. S2D). We also found undetectable levels of spores in strains  
197 overexpressing RapK and RapF (Fig. S2D). Sporulation efficiency decreased from 32.93%  
198 to 0.0002% in the strain overexpressing RapK and from 9.24% to 0.0026% in the strain  
199 overexpressing RapF (Fig. 2). In Bs, RapA dephosphorylates Spo0F in the Spo0A  
200 phosphorelay (32) and this result indicates that it performs the same function in B8741;  
201 furthermore, it suggests that RapK and RapF carry out the same mechanism for regulation  
202 of sporulation initiation.

203

204 Strains carrying P<sub>xyLA</sub>'*rapC* and P<sub>xyLA</sub>'*rapLike* also had reduced sporulation efficiency in  
205 induced media. Sporulation efficiency decreased from 5.43% to 0.0357% and from 12.34%  
206 to 0.1352% when RapC and RapLike were overexpressed, respectively (Fig 2).  
207 Additionally, RapI overexpression slightly decreased sporulation efficiency, from 2.82% to  
208 0.51%. Sporulation efficiency was not decreased by the overexpression of RapF1, F2, I or  
209 RapI1.

210

211 Samples of the Rap-overexpressing strain cultures at 72 h were observed in a microscope.  
212 We detected free spores and bacterial debris in all strains, when Rap proteins were not  
213 overexpressed (Fig. S3). Figure 3 shows representative cells from each induced culture.  
214 Strains overexpressing Rap proteins that did not affect sporulation efficiency (RapF1, F2

215 and RapI1) showed cell morphology similar to that of the control strain, i.e. a sporulated  
216 bacilli with defined endospores. In strains overexpressing RapA<sub>BS</sub>, K and RapF, that had  
217 acutely decreased sporulation efficiency, we observed chained, wrinkled cells with no  
218 spores (Fig. 3). On the other hand, cells from strains overexpressing RapC and RapLike,  
219 were rod-shaped with no evident spore (Fig. 3). Finally, cells from the strain  
220 overexpressing RapI, which had a slight effect on sporulation efficiency, cell morphology  
221 was similar to strains overexpressing RapF1, F2, I1 and the control strain (Fig. 3), showing  
222 a defined endospore.

223

#### 224 **Overexpression of RapF and RapK prevents biofilm formation of Bt8741.**

225 In nature, over 80% of bacteria live in biofilms (49), therefore, biofilm formation is likely a  
226 relevant trait – albeit an understudied one – during the life cycle of Bt and other *B. cereus*  
227 group bacteria. To determine which Rap proteins are involved in the regulation of biofilm  
228 development in Bt8741, we quantified biofilm formation in the air-liquid interphase at 48 h  
229 using Rap-overexpression strains. For this, we suspended cells from the biofilm and  
230 measured optical density (OD<sub>600</sub>). Since 20 mM xylose caused a complete inhibition of  
231 biofilm formation in the Bt8741 control strain (not shown), we first tested the effect of  
232 xylose concentration on this phenotype. We found that biofilm formation was not affected  
233 at 2 mM, but was decreased at higher concentrations of 5, 10 and 15 mM (Fig. S4);  
234 therefore, overexpression of Rap proteins was performed with 2 mM of xylose (50).

235

236 Overexpression of RapK and RapF caused a complete inhibition of biofilm formation of  
237 Bt8741 (Fig. 4A), evident by the significant decrease ( $p < 0.0001$ ) in the OD<sub>600</sub> of the  
238 resuspended biofilm (Fig. 4B). The OD<sub>600</sub> of the biofilms decreased from 0.7115 to 0.0977

239 and from 0.6577 to 0.0961 in strains overexpressing RapK and RapF, respectively (Fig. 4B).  
240 On the other hand, biofilms were normally formed by strains overexpressing RapA<sub>Bs</sub>, C, F2,  
241 I, I1 and RapLike (Fig. 4). Interestingly, the strain overexpressing RapF1 was unable to  
242 form biofilms even when the overexpression was not induced (Fig. 4A and B).

243

244 In order to discard global growth defects in this assay when RapK and RapF are  
245 overexpressed, we measured planktonic growth through OD<sub>600</sub> of the liquid culture media  
246 from the same experiments where biofilm formation was assessed. We found that  
247 planktonic growth was higher in conditions where a biofilm is not formed (Fig. S5). This  
248 indicates that RapK and RapF specifically inhibit biofilm formation (e.g. secretion of  
249 extracellular matrix components).

250

251 **Extracellular proteolytic activity is downregulated by RapC, F, F2, I1 and RapLike in**  
252 **Bt8741.**

253 In Bt, the production of extracellular proteases is crucial during its necrotrophic phase, i.e.  
254 development in insect cadavers. We tested the role of Rap proteins in extracellular  
255 proteolytic activity by measuring the effect of Rap overexpression on hydrolysis halos of  
256 colonies on milk agar (MA) plates. Addition of xylose had no effect ( $p>0.05$ ) on the  
257 hydrolysis halo of the control strain (Fig. 5). In contrast, overexpression of RapC, F, F2, I1  
258 and RapLike decreased the halo area ( $p<0.05$ ; Fig. 5B). In these strains, the halo area  
259 decreased to 41.98%, 37.81%, 46.65%, 47.51% and 34.93%, respectively (Fig. 5B, Fig. S6)  
260 compared to halos in plates where overexpression was not induced (100%). Proteolytic  
261 activity of strains overexpressing RapA<sub>Bs</sub>, K, I and RapF1 was not affected by the induction  
262 ( $p>0.05$ ; Fig. 5A and B).

263

264 **RapC, RapF1, RapF2 and RapLike regulate spreading of Bt8741 colonies.**

265 Colonies of Bt8741 present a spreading phenotype that could be associated to its capacity to  
266 colonize hosts and habitats. Similar passive motility phenotypes have been described in  
267 other species of *Bacillus*, associated to the production of extracellular surfactant molecules  
268 (51–53). To gain insights on this understudied collective trait, we determined the effect of  
269 Rap proteins on radial spreading of colonies of Bt8741 growing on agar media.

270

271 We observed that addition of xylose in the media did not affect spreading of the control  
272 strain (Fig. 6). In contrast, the overexpression of RapC, F1, F2 and RapLike caused a  
273 decrease in spreading ( $p < 0.05$ ) of Bt8741 colonies at day 7 (Fig. 6A and B). The  
274 overexpression of RapC reduced the colony dispersion from 5.15 mm to 0.49 mm  
275 (reduction of 90.4%); RapF1, from 3.73 mm to 1.83 mm (decrease of 50.9%); RapF2 from  
276 5.05 mm to 0.78 mm (decrease of 84.5%); and RapLike from 3.64 mm to 0.65 mm  
277 (decrease of 82.1%) (Fig. 6B). Spreading inhibition is evident in the colony morphology of  
278 these strains (Fig. 6C). We observed that the overexpression of RapC, F2 and RapLike,  
279 completely eliminated this phenotype, while overexpression of RapF1 only decreased  
280 spreading ( $p < 0.05$ ) (Fig. 6B and C).

281

282 The overexpression of RapA<sub>Bs</sub>, K, F, I and RapI1 did not affect the spreading of Bt8741  
283 ( $p > 0.05$ ) (Fig. 6B). Spreading of the strains carrying overexpression plasmids for these Rap  
284 proteins ranged from 4.68 mm to 7.29 mm without induction and from 3.37 mm to 6.84  
285 mm when induced (Fig. 6B). In some cases, Rap overexpression affected colony  
286 morphology, i.e. colonies of strains overexpressing RapK and RapF show an increased

287 dendritic phenotype; however, the spreading phenotype measured as colony radius, is still  
288 present (Fig. 6C).

289

### 290 **Rap-Phr systems diversified into five pherogroups in the *B. cereus* group.**

291 In order to predict functions of Rap paralogs in *B. cereus* (Bc), *B. anthracis* (Ba), *B.*  
292 *mycooides* (Bm), *B. pseudomycooides* (Bps) and *B. cytotoxicus* (Bcyt), we studied the  
293 evolution of Rap proteins in these species and identified their putative signaling peptide  
294 sequences (mature Phr). Additional to the 8 Raps in Bt407 (of which 4 are coded in the  
295 chromosome, and 4 in plasmids) we found 32 *rap-phr* systems in the *B. cereus* group  
296 (Table S2), 30 of which are encoded in chromosome and 2 in plasmids (Table 1).

297

298 The phylogeny of Rap proteins from the *B. cereus* group shows that clades are composed of  
299 Rap proteins from different species, i.e., phylogenetically close Rap homologs can be found  
300 in different species. This indicates that Rap-Phr divergence occurred before speciation in  
301 this group (Fig. 7). Hence, Rap functions discovered in this work could be extrapolated to  
302 the rest of the *B. cereus* group, e.g. Rap proteins found in the same clade as BtRapK and  
303 BtRapF (Bps28285, Bps05775, Bps24285, Bcyt05320, Bc1026, Ba05875, Ba29315,  
304 Bcyt11595, Bcyt05405 and Bcyt02700) may modulate sporulation initiation and biofilm  
305 formation. Since we found that several Rap paralogs are coded in every species of the *B.*  
306 *cereus* group, we suggest that they could regulate a variety of collective functions in all  
307 species, as we describe here for Bt8741.

308

309 We identified 5 pherogroups, each with a putative mature Phr peptide sequence. All five  
310 pherogroup comprise Rap proteins from different species, which share Phr consensus

311 sequences corresponding to the putative mature Phr (Fig. S7). These five pherogroups are  
312 identified with colors in the branches of the phylogeny in figure 7. We found that mature  
313 Phr corresponding to pherogroups 1 and 2 are located in the C-terminal domain of the pro-  
314 peptides (exported Phr sequence). RapI, F, F1 and RapK from Bt are found in these  
315 pherogroups. On the other hand, pherogroup 3 – were RapF2 from Bt is found – consensus  
316 sequences are located in the N-terminal domain of the pro-peptide. Finally, putative mature  
317 Phr peptides from pherogroups 4 and 5 – which include RapLike, C and RapI1 from Bt –  
318 are located in the middle of the exported sequence (Table S3). We observed that only Bt  
319 and Bps encode Rap proteins from all five pherogroups; Rap proteins from Ba and Bcyt are  
320 found in pherogroups 1, 2, 3 and 4; Rap proteins in Bm correspond to pherogroups 1, 3 and  
321 5; finally Rap proteins from Bc are found only in pherogroups 1 and 4 (Fig. 7).

322

## 323 **Discussion**

324 Few studies have addressed multicellular behaviors such as differentiation, cell-  
325 specialization, collective functions, and the resulting ecological interactions in species from  
326 the *B. cereus* group (11, 56). Similarly, molecular mechanisms for the control  
327 differentiation processes in the *B. cereus* group bacteria remain understudied (45, 46, 48, 56,  
328 57). Here we demonstrate that Rap-Phr systems in Bt8741 regulate collective functions  
329 such as sporulation, biofilm formation, production of extracellular proteases and spreading  
330 motility. In fact, Rap-Phr paralogs in this strain are highly multifunctional and redundant,  
331 since five out of eight Rap paralogs modulate more than one collective trait, and all four  
332 collective traits studied were inhibited by more than one Rap protein. Hence, Rap paralogs  
333 appear to constitute a regulatory repertoire that allow Bt populations to respond efficiently  
334 to environmental changes, which aid for survival of the population.

335

336 Although it is well known how Rap-Phr systems participate in differentiation processes of  
337 the gram-positive model bacteria Bs, speciation resulted in divergent Rap proteins in the *B.*  
338 *cereus* and *B. subtilis* groups (43, 44). Therefore, no homologs are shared between the  
339 groups; however, in both cases, speciation resulted in the presence of multiple Rap paralogs  
340 per genome. We propose that Rap proteins that are phylogenetically close to Rap proteins  
341 from Bt8741, could have the same functions in other bacteria of the *B. cereus* group.

342

343 It is not yet clear how bacteria benefit from keeping multiple receptor-signaling peptide  
344 gene pairs comprising this complex signaling network of Rap-Phr systems; however, it has  
345 been shown that redundancy in Rap-Phr systems on Bs is selected by social advantages  
346 (58). Because Rap proteins have a repressive function upon its target, the gain of a novel  
347 Rap-Phr system for the regulation of extracellular public good production enable a  
348 facultative cheating mechanism in which variants with an extra system exploit their  
349 ancestral strain. Here we showed that extracellular public goods such as biofilm matrix  
350 components, extracellular proteases or surfactants, are likely controlled by Rap proteins in  
351 Bt8741; therefore, the same facultative cheating mechanism could be expected during  
352 duplication of *rap-phr* genes in the *B. cereus* group. This represents a selective advantage  
353 by a fitness increasement of the novel population. Multifunctionality seems to have  
354 evolutionary advantages as well. Perhaps, because Rap-Phr systems are known to be  
355 parallel signaling pathways (44) they are not all activated simultaneously; instead, some of  
356 them may be active only under specific conditions, achieving the regulation of various  
357 differentiation processes and collective functions while optimizing energetic costs. Overall,

358 keeping multiple redundant and multifunctional Rap paralogs that control important  
359 collective functions results in a better adaptation and population survival in nature.  
360  
361 Sporulation in the *Bacillus* genus is essential for bacterial survival and dissemination in  
362 their habitats; it is also important for the biotechnological uses of *Bacillus* species. Six Rap-  
363 Phr systems from Bs, including RapA, negatively regulate Spo0A phosphorelay by  
364 dephosphorylating Spo0F, and therefore prevent the activation of Spo0A (32). We found  
365 that RapA<sub>Bs</sub>, retained this function when it was overexpressed in Bt8741. Furthermore, five  
366 Rap-Phr systems from Bt8741 (RapK, F, C, Like and RapI) also regulate sporulation in this  
367 species. We propose that RapK and RapF may function by dephosphorylating Spo0F,  
368 similar to the mechanism carried out by RapA in Bs. This suggestion is supported by three  
369 findings: 1) both RapK and RapF retain the highest conservation of Spo0F binding residues  
370 from RapH, including the catalytic residue Q47; 2) their overexpression resulted in  
371 undetectable number of spores, similar to RapA<sub>Bs</sub> overexpression; 3) the overexpression of  
372 RapA<sub>Bs</sub>, K and RapF caused an identical cell morphology in the three overexpressing  
373 strains. Additionally, RapK and RapF are closely related and both belong to pherogroup 2,  
374 which may indicate that they resulted from a gene duplication event of a Rap ancestor that  
375 dephosphorylated Spo0F. Other Rap proteins that decreased sporulation efficiency are  
376 RapC, Like and RapI; of these, RapC do not contain the catalytic site residue Q47. Further  
377 studies are needed in order to elucidate the mechanisms by which all these receptors  
378 regulate sporulation in Bt and other species from the *B. cereus* group.  
379 RapK and RapF are the only Rap proteins from Bt8741 that prevented biofilm formation.  
380 Because Spo0A-P levels regulate both sporulation and biofilm formation in Bs, we  
381 speculate that bifunctionality of RapK and RapF in Bt8741 results from their activity on



382 Spo0F. We noted that the overexpression of RapA<sub>Bs</sub>, which completely prevented  
383 sporulation, did not affected biofilm formation of Bt. Overexpression of RapA<sub>Bs</sub> may allow  
384 low levels of Spo0A-P in Bt8741, which in Bs are sufficient for the activation of genes  
385 related to production of extracellular matrix components, but not for the activation of early  
386 sporulation genes (13).

387

388 We suggest that Rap proteins have diversified according to the ecological needs of each  
389 species. For example, Bs is a soil dwelling bacteria found associated to rhizosphere forming  
390 biofilms (59). In Bs, six Rap proteins modulate Spo0A-P levels (21, 60), affecting  
391 sporulation and biofilm formation. Here we demonstrate that five Rap proteins modulated  
392 sporulation (RapC, K, F, I and RapLike) while only two of these (RapK and RapF) affected  
393 biofilm formation, perhaps throughtout the Spo0A phosphorelay. This highlights the  
394 importance of sporulation regulation in both species and that probably, biofilm formation is  
395 not as essential in the lifecylce of Bt, as it is in Bs. In contrast, Bt is a soil inhabitant, insect  
396 pathogenic and necrotrophic bacteria (61). In this species, extracellular protease production  
397 is essential for nutrient scavenging, which is normally associated to the necrotrophic stage  
398 of bacterial development in the insect cadaver (40). Additionally, it could be relevant  
399 during the transition from exponential growth to stationary phase in controlled  
400 fermentations or for adaptation against fluctuations in nutrient availability in the  
401 environment. While only one of the twelve Rap proteins from Bs modulates its extracellular  
402 proteolytic activity (RapG) (25), Bt has extended the modulation of extracellular protease  
403 production to five Rap-Phr systems (RapC, F, F2, I1 and RapLike).

404

405 We found that the Spo0A phosphorelay and production of extracellular proteases are highly  
406 interconnected in Bt8741 through the functions of RapC, F and RapLike. Additionally,  
407 extracellular proteolytic activity (specifically the NprA protease) is regulated by the QS  
408 system NprR-NprRB (62), which is also involved in the modulation of the Spo0A  
409 phosphorelay (41, 42). Likewise, NprR also participates in the spreading phenotype of  
410 Bt8741 (A. Verdugo *et. al*, unpublished data), as well RapC and RapLike. Because  
411 sporulation, extracellular protease production and spreading of Bt have evolved to be  
412 regulated and coordinated by multiple QS systems, these collective traits may be important  
413 in the life cycle of Bt and represent essential mechanisms for its ecology.

414

415 Mature Phr signaling peptides from Bs correspond to at least five residues in the C-terminal  
416 end of the pro-Phr or in the middle of the sequence. Sequence analyses of mature Phrs in  
417 Bs has showed that a basic amino acid is found in the second position from the N-terminal  
418 end, and an alanine residue is necessary in the position before the cleavage site for Phr  
419 maturation (22, 63, 64). Our analysis of consensus putative mature Phr sequences showed  
420 that these characteristics are not maintained in mature Phr peptides of the *B cereus* group.  
421 This suggests that signaling peptides are processed differently in these bacteria, this is,  
422 using different sets of extracellular proteases and peptidases that recognize distinct  
423 sequences. In Bt, the identity of a mature Phr has only been shown for Rap8-Phr8 from Bt-  
424 HD73. In that case, the active heptapeptide YAHGKDI is located in the C-terminal end  
425 from its exported sequence (46). RapI from Bt8741, ortholog protein to Rap8, is found in  
426 pherogroup 1, in which the consensus sequence HGKDI corresponds to the five residues in  
427 the C-terminal end from the exported sequence. This indicates that the consensus sequences

428 determined in this study may not exactly predict the signaling peptide sequence, but they  
429 can direct their search in future studies.

430

431 We found that Rap-Phr systems in the *B. cereus* group have evolved into five pherogroups,  
432 each including Rap homologs from different species. This means that signaling peptides  
433 shared by more than one species, could mediate crosstalk or eavesdropping phenomena in  
434 nature, allowing the regulation of collective functions in response to interspecific signals as  
435 described for other gram-positive species (65, 66).

436

437 The *B. cereus* group comprise bacteria with clinical and biotechnological relevance such as  
438 Ba, Bc, Bt, and other environmental and facultative species (38). We show that Rap-Phr QS  
439 systems in Bt are involved in the regulation of ecologically important collective traits, and  
440 our findings are highly relevant for further studies about the *B. cereus* group and contribute  
441 to the knowledge about its ecology. Understanding the regulatory processes for cell  
442 differentiation and specialization in these bacteria may enhance the use of  
443 biotechnologically-relevant species, or the strategies to control human pathogens, through  
444 the intervention of their collective functions at the molecular level. For instance, Ba and Bc  
445 are known for their pathogenic nature against mammals; therefore, elucidating the role of  
446 Rap-Phr systems in the production of virulence factors of these species such as anthrax  
447 toxin and capsule of Ba, or enterotoxins of Bc, could be of high relevance. Additionally, it  
448 is known that QS systems can be synthetically engineered (67, 68). As a result, Rap-Phr  
449 systems could be manipulated in order to enhance Bt survival, insect pathogenesis or cry  
450 protein production. This work serves as a starting point for the study of cell specialization  
451 of the *B. cereus* group bacteria.

452

## 453 **Materials and Methods**

### 454 **Bacterial strains, media and culture conditions**

455 *Bacillus thuringiensis* strain 8741 (Bt8741) (43), derived from Bt407 (Acc. No.  
456 NC\_018877.1, 51), was used as host for the overexpression of Rap proteins. *Bacillus*  
457 *subtilis* strain 168 (Bs168) was used for the amplification of *rapA*. *Escherichia coli* strain  
458 TOP10 was used for construction and cloning of overexpression plasmids before  
459 transforming into Bt8741. Luria-Bertani (LB) broth (10 g L<sup>-1</sup> tryptone, 5 g L<sup>-1</sup> yeast extract  
460 and 5 g L<sup>-1</sup> NaCl) and Nutrient Agar (8 g L<sup>-1</sup> nutrient broth, 15 g L<sup>-1</sup> agar) were used at 30  
461 °C for *Bacillus* cultures and at 37 °C for *E. coli* and 200 rpm for liquid cultures. Milk Agar  
462 was prepared using Nutrient Agar, supplemented with 5% skim milk (41). When needed,  
463 ampicillin (100 µg mL<sup>-1</sup>) or erythromycin (5 µg mL<sup>-1</sup>) was added to media. To induce  
464 expression from the *xyIA* promoter in Bt8741, xylose was used to a final concentration of  
465 20 mM (70), unless otherwise specified.

466

### 467 **Analysis of putative Spo0F-binding amino acids in Raps from Bt407**

468 Based on the RapH residues involved in Spo0F binding in Bs168 (34) we determined the  
469 conservation of the corresponding residues in Raps from Bt407, in order to predict their  
470 capacity to bind to Spo0F. First, we analyzed the conservation of full-length Rap proteins  
471 from Bs168 and Bt8741 in comparison to RapH from Bs168. For this, we performed  
472 pairwise alignments of RapH amino acid sequence (NP\_388565.2) with RapA  
473 (NP\_389125.1), RapB (NP\_391550.1), RapE (NP\_390460.2), RapJ (NP\_388164.1), RapD  
474 (NP\_391519.1) from Bs168, and each of the eight Raps from Bt407 (AFV21721.1,  
475 AFV22194.1, AFV22088.1, AFV16731.1, AFV19251.1, AFV22208.1, AFV16776.1,

476 AFV17466.1), using BlastP tool (71). Then, all sequences were aligned together using  
477 MAFFT version 7 online service (72) with the G-INS-i interactive refinement method (73).  
478 Finally, we identified in the alignment the amino acids of Rap protein sequences that  
479 correspond to the residues of RapH that participate in binding and dephosphorylation of  
480 Spo0F.

481

#### 482 **DNA manipulation**

483 All primers used in this study are listed in Table S4. DNA was isolated from Bs168 and  
484 Bt8741 using the PureLink Genomic DNA Mini Kit (Invitrogen, Carlsbad CA, USA).  
485 QIAprep Spin Miniprep Kit (Qiagen, Germantown, MD, USA) was used routinely for  
486 plasmid extraction and purification. Oligonucleotides were designed for amplifying each  
487 Rap gene from Bt8741 genome or plasmids (Acc. No. NC\_018877.1, NC\_018883.1,  
488 NC\_018886.1, NC\_018879.1, NC\_018878.1) and Bs168 genome (Acc. No. NC\_000964.3),  
489 and synthesized as a commercial service (T4 Oligo, Irapuato, Mexico). PCR products and  
490 restriction reactions were purified using the PureLink Quick PCR Purification Kit  
491 (Invitrogen). When needed, PCR products were isolated from 0.8% agarose gels using the  
492 Zymoclean™ Gel DNA Recovery Kit (ZYMO Research, Irvine, CA, USA). Enzymes  
493 Dream Taq Master Mix, *HindIII*, *Sall* (Thermo Scientific, Waltham, MA, USA), *PstI* and  
494 T4 DNA Ligase (New England Biolabs Inc., Ipswich, MA, USA) were used as  
495 recommended by the manufacturer.

496

#### 497 **Construction of Rap-overexpression Bt8741 strains**

498 All strains and plasmids used in this study are listed in Table S1. For the construction of the  
499 overexpression plasmid pHT315-*P<sub>xyIA</sub>*, the regulatory region of the xylose operon, including

500 the *xylA* promoter ( $P_{xylA}$ ) and the repressor gene *xylR*, were amplified by PCR from Bs168  
501 genome using primers GG1 and GG2 (Table S4). This PCR product was inserted into the  
502 *HindIII* and *PstI* sites of pHT315 plasmid (74), and colonies were PCR checked using  
503 primers DS16 and DS17 (Table S4). The resulting plasmid pHT315- $P_{xylA}$  was transformed  
504 into *E. coli* Top10 competent cells. Then, this plasmid was used for the inducible  
505 overexpression of Rap proteins with xylose in Bt8741. For this, *rap* genes encoded in the  
506 genome of Bt8741 (*rapC*, *rapK*, *rapF*, *rapF1*, *rapF2*, *rapI*, *rapI1* and *rapLike*, Slamti *et al.*,  
507 2014) and *rapA* from Bs168 (RapA<sub>Bs</sub>, Perego *et al.*, 1994) were amplified using the  
508 corresponding primers pairs listed in Table S4, and inserted in-frame between the *PstI* and  
509 *Sall* sites of pHT315- $P_{xylA}$ . Nine overexpression plasmids, one for each Rap protein, were  
510 transformed into *E. coli* Top10 competent cells. All plasmids were then transformed into  
511 Bt8741 electrocompetent cells, using the protocol described in previous studies (41),  
512 generating nine Bt8741 strains for the overexpression each Rap protein. Additionally, we  
513 transformed Bt8741 with the pHT315- $P_{xylA}$  (without a *rap* gene), and the resulting strain  
514 was used as control strain throughout the Rap induction experiments. The complete  
515 sequence of pHT315- $P_{xylA}$ '*rapI* was verified by Illumina sequencing (MGH DNA Core,  
516 Cambridge, MA, USA), and the rest of the  $P_{xylA}$ '*rap* constructions were verified by Sanger  
517 sequencing (Unidad de Servicios Genómicos, LANGEBIO-CINVESTAV, Irapuato,  
518 Mexico) using primers GG26 and DS17 (Table S4).

519

## 520 **Sporulation efficiency**

521 We assessed the effect of the overexpression of Rap proteins on sporulation efficiency in  
522 Bt8741. Preinoculums were prepared by picking a single colony of each strain into 5 mL of  
523 liquid media and grown overnight. Then, 1 mL of preinoculum was centrifuged, washed

524 and suspended in 1 mL of sterile PBS. Glass culture tubes (25 mm diameter) with 5 mL of  
525 LB with erythromycin were inoculated with 50  $\mu$ L (1% v/v) of preinoculum containing  
526  $\approx 10^7$  cfu ml<sup>-1</sup> and incubated for 72 h. All strains were cultured in triplicate, in LB with and  
527 without the addition of xylose. To determine growth and sporulation, total and  
528 thermoresistant CFU were calculated by plating 10-fold serial dilutions in nutrient agar. For  
529 thermoresistant CFU, samples of 100  $\mu$ L were incubated at 80 °C for 20 min prior to  
530 diluting and plating. Sporulation efficiency was calculated as the percentage of  
531 thermoresistant CFU in total CFU.

532

### 533 **Biofilm formation assay**

534 We evaluated the effect of the overexpression of Rap proteins on the capacity of Bt874 to  
535 form biofilms. For this assay, we used 13 x 100 mm glass tubes with 3 mL Nutrient Broth +  
536 erythromycin, with and without the addition of xylose to a final concentration of 2 mM.  
537 Three  $\mu$ L of preinoculum was added in triplicates, and the inoculated tubes were incubated  
538 without agitation at 31 °C  $\pm$  1 °C for 48 hours. The culture media was then removed with a  
539 syringe with needle. The biofilm and ring attached to the wall of the tube, composed of  
540 cells from the biofilm, were resuspended in 1.5 mL of sterile PBS and the optical density  
541 (OD<sub>600</sub>) was measured. The OD<sub>600</sub> was also measured from the removed liquid media to  
542 address planktonic growth. At least 5 replicates of each treatment were performed.

543

### 544 **Extracellular proteolytic activity assay**

545 To evaluate the effect of Rap overexpression in extracellular proteolytic activity of Bt8741,  
546 2  $\mu$ L preinoculums of each Rap-overexpression strain, prepared as described above, were  
547 spotted in triplicate on milk agar with and without the addition of xylose. The hydrolysis

548 halo area was measured after 24 h of incubation using the Image Lab™ Software  
549 (BIORAD). To correct for differences in colony growth, we subtracted the colony area.

550

### 551 **Spreading phenotype assay**

552 The spreading phenotype of Rap-overexpression Bt8741 variants was followed in colonies  
553 spotted on agar. For this assay, we used diluted nutrient agar (NA) (0.8 g L<sup>-1</sup> Nutrient broth,  
554 1.5 g L<sup>-1</sup> agar) with erythromycin and with or without the addition of xylose. Plates were  
555 air-dried inside a biological hood for 60 minutes prior to inoculation. Then, 5 µL of  
556 preinoculum cultures were spotted in the center of the plate, dried for 5 minutes and  
557 incubated at 30 °C for 14 days. The inoculated agar plates were photographed at day 1, 3, 5,  
558 7 and 14, using a gel documentation system (Gel Doc™ XR+, BIORAD). Colony area was  
559 measured using the Image Lab™ Software (BIORAD) and radial growth was calculated.  
560 For normalization of radial dispersion, we subtracted from all observations the colony  
561 radius at day 1, which corresponds to the inoculated droplet area. Three replicates of each  
562 treatment were performed.

563

### 564 **Phylogenetic Analysis**

565 To reconstruct the phylogeny of Rap proteins in the *B. cereus* group, we first selected one  
566 representative strain of each species from NCBI GenBank, including *Bacillus cereus*  
567 ATCC14579 (Accession NC\_004722.1), *Bacillus anthracis* A0248 (NC\_012659.1),  
568 *Bacillus thuringiensis* 407 (NC\_018877.1), *Bacillus mycoides* ATCC6442  
569 (NZ\_CP009692.1), *Bacillus pseudomycooides* DMS12442 (NZ\_CM000745.1) and *Bacillus*  
570 *cytotoxicus* NVH391-98 (NC\_009674.1). Strains were selected based on the availability of  
571 a complete genome (as of July of 2018) and thus, *Bacillus weihenstephanensis* was



572 excluded. We searched for Rap protein homologs in the selected genomes by querying the  
573 amino acid sequence of *B. subtilis* RapA (NP\_389125.1) and each of the eight Rap  
574 sequences of *B. thuringiensis* 407: RapC (AFV21721.1), RapK (AFV22194.1), RapF  
575 (AFV22088.1), RapF1 (AFV16731.1), RapF2 (AFV19251.1), RapI (AFV22208.1), RapI1  
576 (AFV16776.1) and RapLike (AFV17466.1). Homologs were searched using BLAST tool  
577 (71), the tBlastn tool and a local script designed for performing the blast search in an  
578 assembled database of the selected genomes. To ensure the identity of the Rap protein  
579 homologs, Blast hits were submitted manually to the Conserved Domain Search-NCBI tool  
580 (75) in order to determine if they presented the characteristic TPR-containing domain. Rap  
581 protein amino acid sequences were aligned in MAFFT version 7 (72) using the G-INS-i  
582 iterative refinement method which incorporates pairwise alignment algorithms (73). RapA  
583 and RapH from Bs168 were also included as outgroups for the phylogenetic reconstruction.  
584 The selection of the best substitution evolutionary model (JTT+G+I+F) was made using the  
585 Smart Model Selection with the Akaike Information Criterion in PhyML 3.0 (76, 77), as  
586 well as the phylogeny reconstruction by the Maximum Likelihood method using 1000  
587 bootstraps to support the phylogenetic prediction.

588

### 589 **Phr pro-peptide identification and pherogroup prediction**

590 Additional to the identification of Rap homologs in the *B. cereus* group, we also analyzed  
591 the putative *phr* genes, which code for pro-Phr, the precursor of the quorum sensing signal  
592 peptide. For this, we performed a manual search targeting open reading frames (ORFs)  
593 between 30 and 100 amino acids of length, downstream from the *rap* gene sequences.  
594 When present, each Phr amino acid sequence was analyzed for the presence of a signal  
595 peptide for secretion and a cleavage site using SignalP4.1 (78). The putative mature

596 signaling peptide (mature Phr) and pherogroup prediction were performed from the  
597 exported Phr amino acid sequences (pro-Phr). For this, Phrs corresponding to Rap proteins  
598 from different clades of the phylogenetic reconstruction were analyzed separately. The  
599 amino acid sequences of the pro-Phr from each clade were aligned using ClustalW (79).  
600 Pherogroups were identified by manually, by modifying the groups of aligned Phrs and  
601 looking for consensus sequences in the alignments. For better identification of consensus  
602 sequences, sequence Logos were created for each pherogroup using the Seq2Logo 2.0  
603 online service (80).

604

#### 605 **Statistics**

606 All the statistical analyses were performed using GraphPad Prism version 7.0a. Data  
607 obtained from the extracellular proteolytic activity assay, spreading (at day 7) and biofilm  
608 formation were analyzed with a multiple *t*-tests to search for differences between not  
609 induced and induced Rap protein overexpression conditions of each strain. Significance of  
610 0.05 was used in all statistical tests.

611

#### 612 **Acknowledgements**

613 Authors thank all members of the Microbe-Plant Interactions group at CIDEA for their  
614 comments and suggestions. We gratefully acknowledge Gabriela Olmedo-Álvarez for her  
615 contributions in analyses of phylogenetic data, and critical review of the manuscript.

616 Bernardo Aguilar and Enrique Hurtado contributed with technical assistance in the  
617 phylogenetic analyses. GG Received a scholarship 636324 from Conacyt. This work was  
618 partially funded by Conacyt (Fomix 267837) for MT.

619

## 620 **References**

- 621 1. Crespi BJ. 2001. The evolution of social behavior in microorganisms. *Trends Ecol*  
622 *Evol* 16:178–183.
- 623 2. Vlamakis H, Aguilar C, Losick R, Kolter R. 2008. Control of cell fate by the  
624 formation of an architecturally complex bacterial community. *Genes Dev* 22:945–  
625 953.
- 626 3. Shapiro JA. 1998. Thinking about bacterial populations as multicellular organisms.  
627 *Annu Rev Microbiol* 52:81–104.
- 628 4. Jeckel H, Matthey N, Drescher K. 2019. Biophysics: Common concepts for bacterial  
629 collectives. *Elife* 8:e47019.
- 630 5. van Vliet S, Ackermann M. 2015. Bacterial Ventures into Multicellularity:  
631 Collectivism through Individuality. *PLoS Biol* 13:1–5.
- 632 6. Claessen D, Rozen DE, Kuipers OP, Søgaard-Andersen L, Van Wezel GP. 2014.  
633 Bacterial solutions to multicellularity: A tale of biofilms, filaments and fruiting  
634 bodies. *Nat Rev Microbiol* 12:115–124.
- 635 7. Ruby EG. 1996. LESSONS FROM A COOPERATIVE, BACTERIAL-ANIMAL  
636 ASSOCIATION: The *Vibrio fischeri*–*Euprymna scolopes* Light Organ Symbiosis.  
637 *Annu Rev Microbiol* 50:591–624.
- 638 8. Muñoz-Dorado J, Marcos-Torres FJ, García-Bravo E, Moraleda-Muñoz A, Pérez J.  
639 2016. Myxobacteria: Moving, killing, feeding, and surviving together. *Front*  
640 *Microbiol* 7:781.
- 641 9. Lopez D, Vlamakis H, Kolter R. 2008. Generation of multiple cell types in *Bacillus*  
642 *subtilis*. *FEMS Microbiol Rev* 33:152–163.
- 643 10. López D, Kolter R. 2010. Extracellular signals that define distinct and coexisting cell

- 644 fates in *Bacillus subtilis*. *FEMS Microbiol Rev* 34:134–149.
- 645 11. Kovács ÁT, Dragoš A. 2019. Evolved Biofilm: Review on the Experimental  
646 Evolution Studies of *Bacillus subtilis* Pellicles. *J Mol Biol* in press.
- 647 12. Kearns DB, Chu F, Rudner R, Losick R. 2004. Genes governing swarming in  
648 *Bacillus subtilis* and evidence for a phase variation mechanism controlling surface  
649 motility. *Mol Microbiol* 52:357–369.
- 650 13. Fujita M, González-Pastor JE, Losick R. 2005. High- and low-threshold genes in the  
651 *Spo0A* regulon of *Bacillus subtilis*. *J Bacteriol* 187:1357–1368.
- 652 14. Auchtung JM, Lee CA, Grossman AD. 2006. Modulation of the ComA-Dependent  
653 Quorum Response in *Bacillus subtilis* by Multiple Rap Proteins and Phr Peptides. *J*  
654 *Bacteriol* 188:5273–5285.
- 655 15. Mukai K, Kawata M, Tanaka T. 1990. Isolation and phosphorylation of the *Bacillus*  
656 *subtilis* *degS* and *degU* gene products. *J Biol Chem* 265:20000–20006.
- 657 16. Bassler BL, Losick R. 2006. Bacterially speaking. *Cell* 125:237–246.
- 658 17. Waters CM, Bassler BL. 2005. Quorum sensing: cell-to-cell communication in  
659 bacteria. *Annu Rev Cell Dev Biol* 21:319–346.
- 660 18. Williams P. 2007. Quorum sensing, communication and cross-kingdom signalling in  
661 the bacterial world. *Microbiology* 153:3923–3938.
- 662 19. Declerck N, Bouillaut L, Chaix D, Rugani N, Slamti L, Hoh F, Lereclus D, Arold ST.  
663 2007. Structure of PlcR: Insights into virulence regulation and evolution of quorum  
664 sensing in Gram-positive bacteria. *Proc Natl Acad Sci* 104:18490–18495.
- 665 20. Rocha-Estrada J, Aceves-Diez AE, Guarneros G, De La Torre M. 2010. The RNPP  
666 family of quorum-sensing proteins in Gram-positive bacteria. *Appl Microbiol*  
667 *Biotechnol* 87:913–923.

- 668 21. Neiditch MB, Capodagli GC, Prehna G, Federle MJ. 2017. Genetic and structural  
669 analyses of RRNPP intercellular peptide signaling of Gram-positive bacteria. *Annu*  
670 *Rev Genet* 51:311–333.
- 671 22. Pottathil M, Lazazzera BA. 2003. The extracellular Phr peptide–Rap phosphatase  
672 signaling circuit of *Bacillus subtilis*. *Front Biosci* 8:32–45.
- 673 23. Core L, Perego M. 2003. TPR-mediated interaction of RapC with ComA inhibits  
674 response regulator-DNA binding for competence development in *Bacillus subtilis*.  
675 *Mol Microbiol* 49:1509–1522.
- 676 24. Perego M. 1997. A peptide export-import control circuit modulating bacterial  
677 development regulates protein phosphatases of the phosphorelay. *Proc Natl Acad Sci*  
678 *U S A* 94:8612–8617.
- 679 25. Ogura M, Shimane K, Asai K, Ogasawara N, Tanaka T. 2003. Binding of response  
680 regulator DegU to the *aprE* promoter is inhibited by RapG, which is counteracted by  
681 extracellular PhrG in *Bacillus subtilis*. *Mol Microbiol* 49:1685–1697.
- 682 26. Solomon JM, Lazazzera BA, Grossman AD. 1996. Purification and characterization  
683 of an extracellular peptide factor that affects two different developmental pathways  
684 in *Bacillus subtilis*. *Genes Dev* 10:2014–2024.
- 685 27. Ogura M, Fujita Y. 2007. *Bacillus subtilis* rapD, a direct target of transcription  
686 repression by RghR, negatively regulates *srfA* expression. *FEMS Microbiol Lett*  
687 268:73–80.
- 688 28. Bongiorno C, Ishikawa S, Stephenson S, Ogasawara N, Perego M. 2005. Synergistic  
689 regulation of competence development in *Bacillus subtilis* by two Rap-Phr systems.  
690 *J Bacteriol* 187:4353–4361.
- 691 29. Hayashi K, Kensuke T, Kobayashi K, Ogasawara N, Ogura M. 2006. *Bacillus*

- 692 subtilis RghR (YvaN) represses rapG and rapH, which encode inhibitors of  
693 expression of the srfA operon. *Mol Microbiol* 59:1714–1729.
- 694 30. Smits WK, Bongiorno C, Veening J-W, Hamoen LW, Kuipers OP, Perego M. 2007.  
695 Temporal separation of distinct differentiation pathways by a dual specificity Rap-  
696 Phr system in *Bacillus subtilis*. *Mol Microbiol* 65:103–120.
- 697 31. Boguslawski KM, Hill PA, Griffith KL. 2015. Novel mechanisms of controlling the  
698 activities of the transcription factors Spo0A and ComA by the plasmid-encoded  
699 quorum sensing regulators Rap60-Phr60 in *Bacillus subtilis*. *Mol Microbiol* 96:325–  
700 348.
- 701 32. Perego M, Hanstein C, Welsh KM, Djavakhishvili T, Glaser P, Hoch JA. 1994.  
702 Multiple protein-aspartate phosphatases provide a mechanism for the integration of  
703 diverse signals in the control of development in *B. subtilis*. *Cell* 79:1047–1055.
- 704 33. Jiang M, Grau R, Perego M. 2000. Differential processing of propeptide inhibitors of  
705 rap phosphatases in *Bacillus subtilis*. *J Bacteriol* 182:303–310.
- 706 34. Parashar V, Mirouze N, Dubnau DA, Neiditch MB. 2011. Structural basis of  
707 response regulator dephosphorylation by rap phosphatases. *PLoS Biol* 9:e1000589.
- 708 35. Parashar V, Jeffrey PD, Neiditch MB. 2013. Conformational Change-Induced  
709 Repeat Domain Expansion Regulates Rap Phosphatase Quorum-Sensing Signal  
710 Receptors. *PLoS Biol* 11:e1001512.
- 711 36. Burbulys D, Trach KA, Hoch JA. 1991. Initiation of Sporulation in *B. subtilis* is  
712 Controlled by a Multicomponent Phosphorelay. *Cell* 64:545–552.
- 713 37. Perego M. 2001. A new family of aspartyl phosphate phosphatases targeting the  
714 sporulation transcription factor Spo0A of *Bacillus subtilis*. *Mol Microbiol* 42:133–  
715 143.

- 716 38. Ehling-Schulz M, Koehler TM, Lereclus D. 2019. The *Bacillus cereus* Group:  
717 *Bacillus* species with Pathogenic Potential. *Microbiol Spectr* 6 GPP3-0032–2018.
- 718 39. Anderson I, Sorokin A, Kapatral V, Reznik G, Bhattacharya A, Mikhailova N, Burd  
719 H, Joukov V, Kaznadzey D, Walunas T, Souza MÕ, Larsen N, Pusch G, Liolios K,  
720 Grechkin Y, Lapidus A, Goltsman E, Chu L, Fonstein M, Ehrlich SD. 2005.  
721 Comparative genome analysis of *Bacillus cereus* group genomes with *Bacillus*  
722 *subtilis*. *FEMS Microbiol Lett* 250:175–184.
- 723 40. Dubois T, Lemy C, Buisson C, Faegri K, Nielsen-Ieroux C, Gohar M, Jacques P,  
724 Ramarao N, Kolstø A. 2012. Necrotrophism is a quorum-sensing-regulated lifestyle  
725 in *Bacillus thuringiensis*. *PLoS Pathog* 8:e1002629.
- 726 41. Cabrera R, Rocha J, Flores V, Vázquez-Moreno L, Guarneros G, Olmedo G,  
727 Rodríguez-Romero A, de la Torre M. 2014. Regulation of sporulation initiation by  
728 NprR and its signaling peptide NprRB: molecular recognition and conformational  
729 changes. *Appl Microbiol Biotechnol* 98:9399–9412.
- 730 42. Cabrera R, Rodríguez-Romero A, Guarneros G, de la Torre M. 2016. New insights  
731 into the interaction between the quorum-sensing receptor NprR and its DNA target,  
732 or the response regulator Spo0F. *FEBS Lett* 590:3243–3253.
- 733 43. Rocha J, Flores V, Cabrera R, Soto-Guzmán A, Granados G, Juaristi E, Guarneros G,  
734 De La Torre M. 2012. Evolution and some functions of the NprR-NprRB quorum-  
735 sensing system in the *Bacillus cereus* group. *Appl Microbiol Biotechnol* 94:1069–  
736 1078.
- 737 44. Even-Tov E, Omer Bendori S, Pollak S, Eldar A. 2016. Transient Duplication-  
738 Dependent Divergence and Horizontal Transfer Underlie the Evolutionary Dynamics  
739 of Bacterial Cell-Cell Signaling. *PLoS Biol* 14:1–23.

- 740 45. Bongiorno C, Stoessel R, Shoemaker D, Perego M. 2006. Rap Phosphatase of  
741 Virulence Plasmid pXO1 Inhibits *Bacillus anthracis* Sporulation. *J Bacteriol*  
742 188:487–498.
- 743 46. Fazion F, Perchat S, Buisson C, Vilas-Bôas G, Lereclus D. 2018. A plasmid-borne  
744 Rap-Phr system regulates sporulation of *Bacillus thuringiensis* in insect larvae.  
745 *Environ Microbiol* 20:145–155.
- 746 47. Slamti L, Perchat S, Huillet E, Lereclus D. 2014. Quorum sensing in *Bacillus*  
747 *thuringiensis* is required for completion of a full infectious cycle in the insect.  
748 *Toxins (Basel)* 6:2239–2255.
- 749 48. Cardoso P de F, Perchat S, Vilas-Boas LA, Lereclus D, Vilas-Bôas GT. 2019.  
750 Diversity of the Rap–Phr quorum-sensing systems in the *Bacillus cereus* group. *Curr*  
751 *Genet* 1–15.
- 752 49. Flemming HC, Wuertz S. 2019. Bacteria and archaea on Earth and their abundance  
753 in biofilms. *Nat Rev Microbiol* 17:247–260.
- 754 50. Bhavsar AP, Zhao X, Brown ED. 2001. Development and characterization of a  
755 xylose-dependent system for expression of cloned genes in *Bacillus subtilis*:  
756 Conditional complementation of a teichoic acid mutant. *Appl Environ Microbiol*  
757 67:403–410.
- 758 51. Kinsinger RF, Shirk MC, Fall R. 2003. Rapid surface motility in *Bacillus subtilis* is  
759 dependent on extracellular surfactin and potassium ion. *J Bacteriol* 185:5627–5631.
- 760 52. Kearns DB. 2010. A field guide to bacterial swarming motility. *Nat Rev Microbiol*  
761 8:634–644.
- 762 53. Hölscher T, Kovács ÁT. 2017. Sliding on the surface: bacterial spreading without an  
763 active motor. *Environ Microbiol* 19:2537–2545.



- 764 54. Béchet M, Caradec T, Hussein W, Abderrahmani A, Chollet M, Leclère V, Dubois T,  
765 Lereclus D, Pupin M, Jacques P. 2012. Structure, biosynthesis, and properties of  
766 kurstakins, nonribosomal lipopeptides from *Bacillus* spp. *Appl Microbiol Biotechnol*  
767 95:593–600.
- 768 55. Gélis-Jeanvoine S, Canette A, Gohar M, Caradec T, Lemy C, Gominet M, Jacques P,  
769 Lereclus D, Slamti L. 2017. Genetic and functional analyses of *krs*, a locus encoding  
770 kurstakin, a lipopeptide produced by *Bacillus thuringiensis*. *Res Microbiol* 168:356–  
771 368.
- 772 56. Fagerlund A, Dubois T, Økstad OA, Verplaetse E, Gilois N, Bennaceur I, Perchat S,  
773 Gominet M, Aymerich S, Kolstø AB, Lereclus D, Gohar M. 2014. SinR controls  
774 enterotoxin expression in *Bacillus thuringiensis* biofilms. *PLoS One* 9:e87532.
- 775 57. Raynor MJ, Roh JH, Widen SG, Wood TG, Koehler TM. 2018. Regulons and  
776 protein–protein interactions of PRD-containing *Bacillus anthracis* virulence  
777 regulators reveal overlapping but distinct functions. *Mol Microbiol* 109:1–22.
- 778 58. Even-Tov E, Omer Bendori S, Valastyan J, Ke X, Pollak S, Bareia T, Ben-Zion I,  
779 Bassler BL, Eldar A. 2016. Social Evolution Selects for Redundancy in Bacterial  
780 Quorum Sensing. *PLoS Biol* 14:e1002386.
- 781 59. Earl AM, Losick R, Kolter R. 2008. Ecology and genomics of *Bacillus subtilis*.  
782 *Trends Microbiol* 16:269–275.
- 783 60. Mirouze N, Dubnau D. 2013. Chance and Necessity in *Bacillus subtilis*  
784 Development. *Microbiol Spectr* 1:TBS-0004-2012.
- 785 61. Argôlo-Filho RC, Loguercio LL. 2014. *Bacillus thuringiensis* is an environmental  
786 pathogen and host-specificity has developed as an adaptation to human-generated  
787 ecological niches. *Insects* 5:62–91.

- 788 62. Perchat S, Dubois T, Zouhir S, Gominet M, Poncet S, Lemy C, Aumont-Nicaise M,  
789 Deutscher J, Gohar M, Nessler S, Lereclus D. 2011. A cell-cell communication  
790 system regulates protease production during sporulation in bacteria of the *Bacillus*  
791 *cereus* group. *Mol Microbiol* 82:619–633.
- 792 63. Perego M, Brannigan JA. 2001. Pentapeptide regulation of aspartyl-phosphate  
793 phosphatases. *Peptides* 22:1541–1547.
- 794 64. Stephenson S, Mueller C, Jiang M, Perego M. 2003. Molecular analysis of Phr  
795 peptide processing in *Bacillus subtilis*. *J Bacteriol* 185:4861–4871.
- 796 65. Miller EL, Kjos M, Abrudan MI, Roberts IS, Veening JW, Rozen DE. 2018.  
797 Eavesdropping and crosstalk between secreted quorum sensing peptide signals that  
798 regulate bacteriocin production in *Streptococcus pneumoniae*. *ISME J* 12:2363–2375.
- 799 66. Fleuchot B, Guillot A, Mézange C, Besset C, Chambellon E, Monnet V, Gardan R.  
800 2013. Rgg-Associated SHP Signaling Peptides Mediate Cross-Talk in Streptococci.  
801 *PLoS One* 8:e66042.
- 802 67. Zhang F, Kwan A, Xu A, Süel GM. 2015. A synthetic quorum sensing system  
803 reveals a potential private benefit for public good production in a biofilm. *PLoS One*  
804 10:e0132948.
- 805 68. Geddes BA, Paramasivan P, Joffrin A, Thompson AL, Christensen K, Jorin B, Brett  
806 P, Conway SJ, Oldroyd GED, Poole PS. 2019. Engineering transkingdom signalling  
807 in plants to control gene expression in rhizosphere bacteria. *Nat Commun* 10:3430.
- 808 69. Sheppard AE, Poehlein A, Rosenstiel P, Liesegang H, Schulenburg H. 2013.  
809 Complete genome sequence of *Bacillus thuringiensis* strain 407 Cry-. *Genome*  
810 *Announc* 1:e00158-12.
- 811 70. Grandvalet C, Gominet M, Lereclus D. 2001. Identification of genes involved in the

- 812           activation of the *Bacillus thuringiensis* inhA metalloprotease gene at the onset of  
813           sporulation. *Microbiology* 147:1805–1813.
- 814   71.   Altschul SF, Gish W, Miller W, Myers EW, Lipman DJ. 1990. Basic local alignment  
815           search tool. *J Mol Biol* 215:403–410.
- 816   72.   Katoh K, Rozewicki J, Yamada KD. 2017. MAFFT online service: multiple  
817           sequence alignment, interactive sequence choice and visualization. *Brief Bioinform*  
818           in press.
- 819   73.   Katoh K, Kuma KI, Toh H, Miyata T. 2005. MAFFT version 5: Improvement in  
820           accuracy of multiple sequence alignment. *Nucleic Acids Res* 33:511–518.
- 821   74.   Arantes O, Lereclus D. 1991. Construction of Cloning Vectors for *Bacillus*  
822           *thuringiensis*. *Gene* 108:115–119.
- 823   75.   Marchler-Bauer A, Bo Y, Han L, He J, Lanczycki CJ, Lu S, Chitsaz F, Derbyshire  
824           MK, Geer RC, Gonzales NR, Gwadz M, Hurwitz DI, Lu F, Marchler GH, Song JS,  
825           Thanki N, Wang Z, Yamashita RA, Zhang D, Zheng C, Geer LY, Bryant SH. 2016.  
826           CDD/SPARCLE: functional classification of proteins via subfamily domain  
827           architectures. *Nucleic Acids Res* 45:D200–D203.
- 828   76.   Guindon S, Dufayard JF, Lefort V, Anisimova M, Hordijk W, Gascuel O. 2010.  
829           New algorithms and methods to estimate maximum-likelihood phylogenies:  
830           Assessing the performance of PhyML 3.0. *Syst Biol*.
- 831   77.   Lefort V, Longueville JE, Gascuel O. 2017. SMS: Smart Model Selection in PhyML.  
832           *Mol Biol Evol*.
- 833   78.   Nielsen H. 2017. Predicting secretory proteins with SignalP Protein Function  
834           Prediction. Humana Press, New York, NY.
- 835   79.   Larkin MA, Blackshields G, Brown NP, Chenna R, McGettigan PA, McWilliam H,

836 Valentin F, Wallace IM, Wilm A, Lopez R, Thompson JD, Gibson TJ, Higgins DG.  
837 2007. Clustal W and Clustal X version 2.0. *Bioinformatics* 23:2947–2948.  
838 80. Thomsen MCF, Nielsen M. 2012. Seq2Logo: a method for construction and  
839 visualization of amino acid binding motifs and sequence profiles including sequence  
840 weighting, pseudo counts and two-sided representation of amino acid enrichment  
841 and depletion. *Nucleic Acids Res* 40:W281–W287.  
842  
843

844 **Tables**

845 **Table 1.** Rap-Phr systems encoded in *B. subtilis* 168 and in species from the *B. cereus*

846 group.

| Specie                                    | Number of Rap-Phr systems | Location   |         |
|-------------------------------------------|---------------------------|------------|---------|
|                                           |                           | Chromosome | Plasmid |
| <i>Bacillus subtilis</i> 168              | 12                        | 11         | 1       |
| <i>Bacillus cereus</i> ATCC 14579         | 5                         | 5          | 0       |
| <i>Bacillus anthracis</i> str. A0248      | 6                         | 5          | 1       |
| <i>Bacillus thuringiensis</i> 407         | 8                         | 4          | 4       |
| <i>Bacillus mycoides</i> ATCC 6442        | 5                         | 4          | 1       |
| <i>Bacillus pseudomycooides</i> DMS 12442 | 8                         | 8          | 0       |
| <i>Bacillus cytotoxicus</i> NVH 391-98    | 8                         | 8          | 0       |

847

848

849 **Figures**

850

851 **Figure 1**

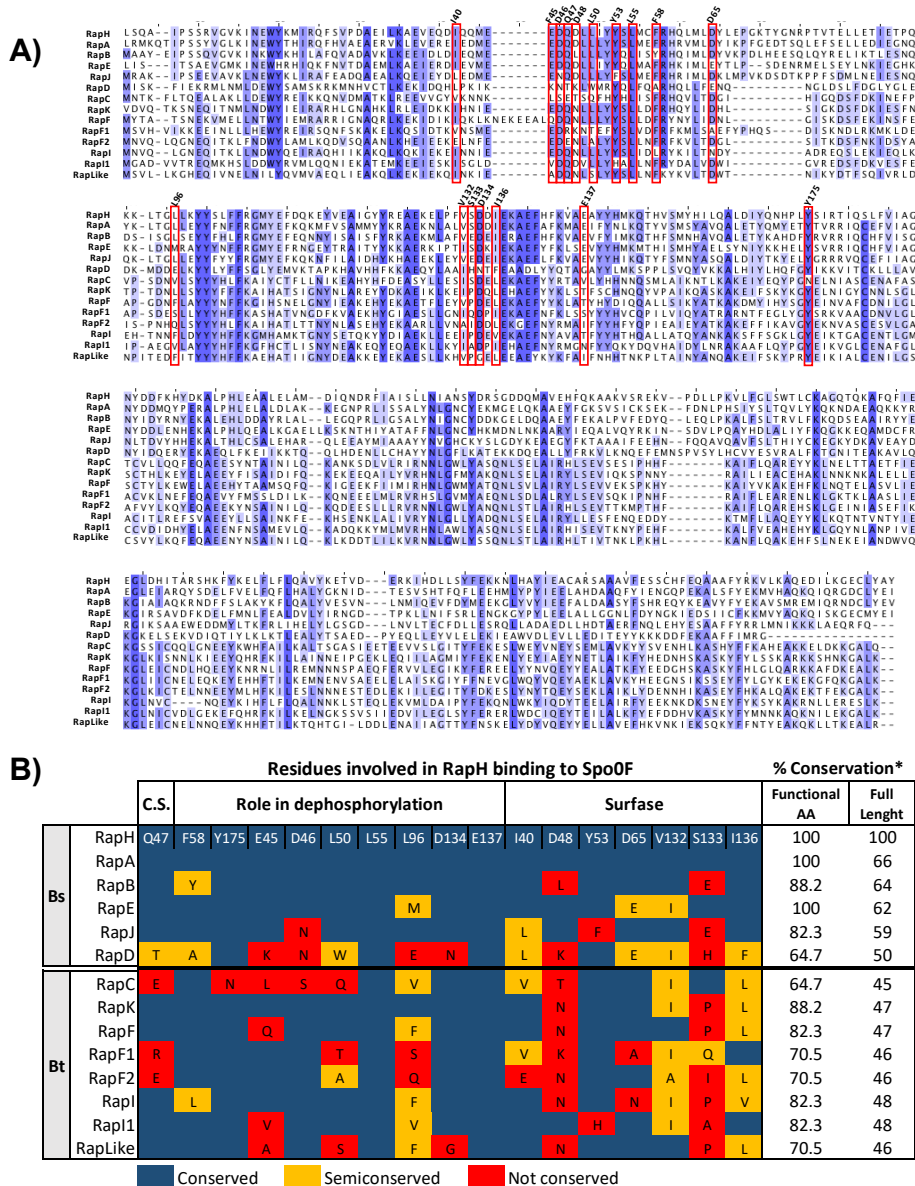

852

853 **Figure 1.** Prediction of the capacity of Rap proteins from Bt8741 to bind and

854 dephosphorylate Spo0F. A) Multiple sequence alignment of the complete amino acid

855 sequences of RapH, A, B, E, J and D from *B. subtilis* 168, and eight Rap proteins from

856 Bt8741. Blue highlights indicate highly conserved amino acids. Residues involved in the  
857 RapH-Spo0F binding are indicated in red rectangles and its position in RapH is shown on  
858 top of the alignment. B) Conservation of residues involved in RapH binding to Spo0F.  
859 Residues were considered as semiconserved when a functional amino acid of RapH was  
860 substituted with another amino acid with similar characteristics. Bs, *Bacillus subtilis* 168;  
861 Bt, *Bacillus thuringiensis* 407; C.S., Catalytic Site; \*Percentage of conserved and  
862 semiconserved amino acids in pairwise alignment to RapH.  
863  
864

865 **Figure 2**

866

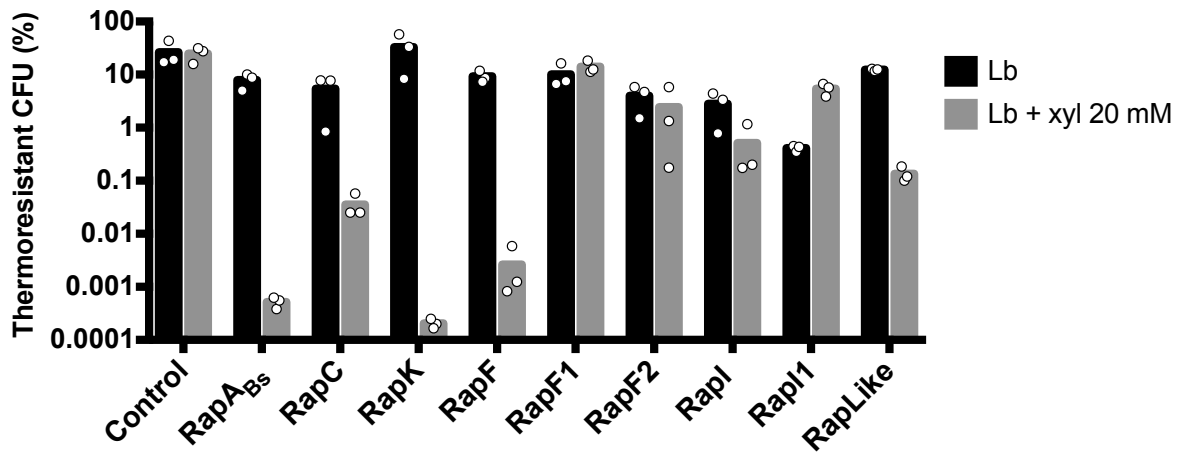

867

868 **Figure 2.** Sporulation efficiency of Bt8741 carrying overexpression plasmids for Rap

869 proteins, with and without addition of inducer. Columns represent average of three

870 individual measurements, shown as dots.

871



872 **Figure 3**

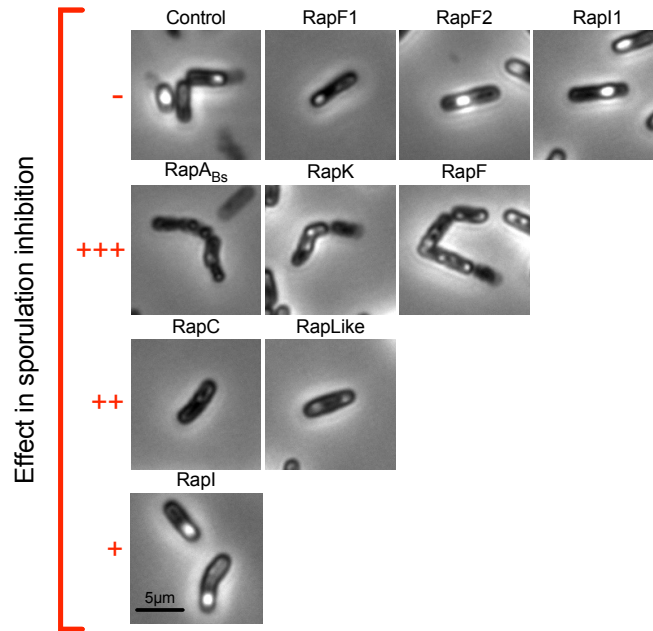

873

874 **Figure 3.** Cell morphology in strains with induced Rap protein overexpression at 72 h.

875 Phase contrast microscopy 63X and 1.8X magnification. -, no effect; +, decrease under

876 10-fold; decrease between 90 and 160-fold; +++, decrease >1,000-fold.

877

878

879 **Figure 4**

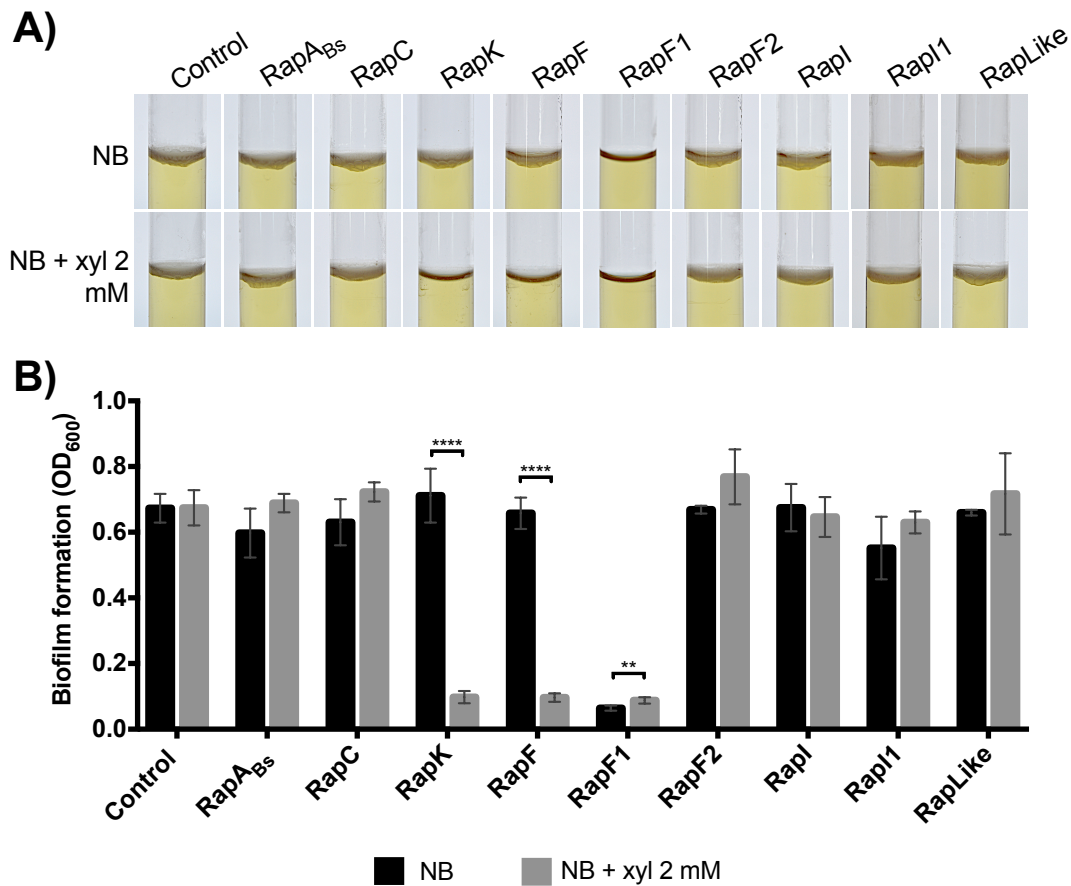

880

881 **Figure 4.** Biofilm formation of Rap-overexpression strains at 48 h. A) Biofilms formed in  
882 the liquid-air interphase in 13 x 100 mm glass tubes at 48 h. Biofilms are identified as a  
883 white layer on the surface. B) Biofilm formation quantification of Rap-overexpression  
884 strains in induced and not induced media after 48 h. Columns represent average of 5  
885 replicates,  $\pm$  SD. NB, Nutrient Broth; \*\*,  $p < 0.005$ ; \*\*\*\*,  $p < 0.0001$ .

886

887 **Figure 5**

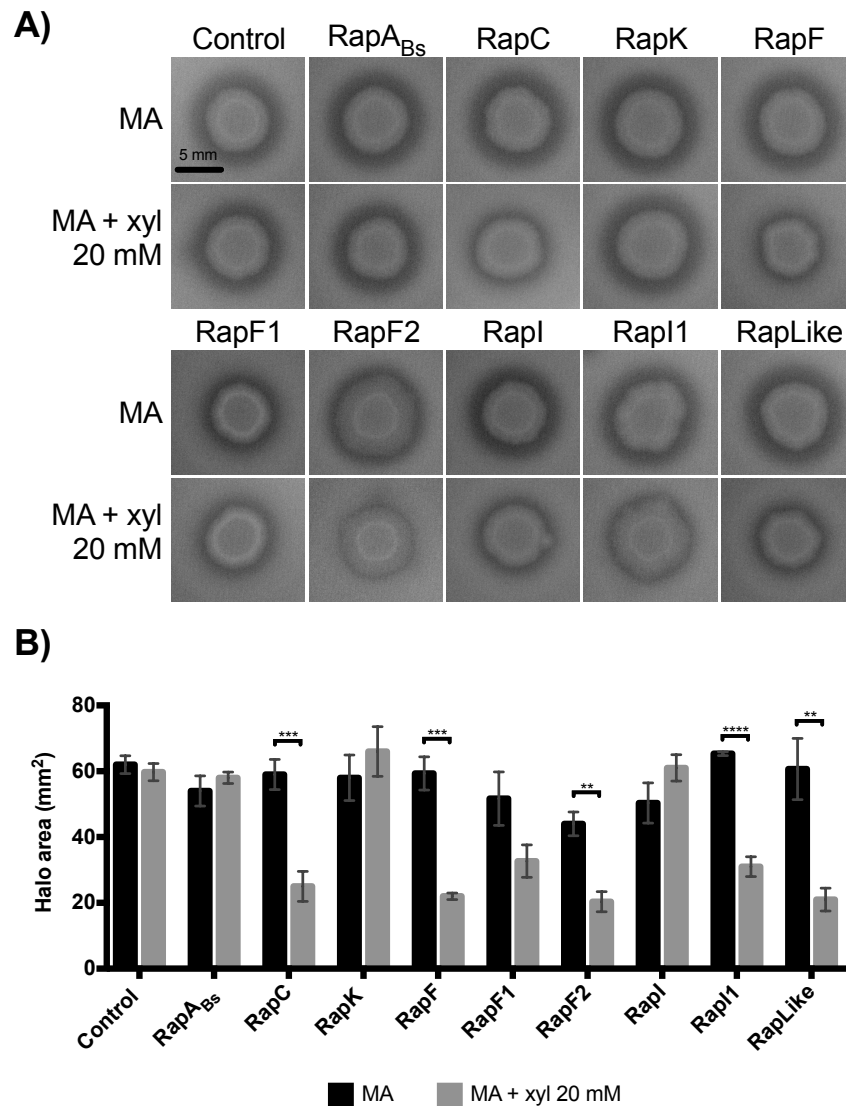

888

889 **Figure 5.** Extracellular proteolytic activity of Rap-overexpression strains. A) Effect of Rap

890 protein overexpression in the hydrolysis halo of Rap-overexpression strains colonies. B)

891 Hydrolysis halo area with and without Rap-overexpression induction. Columns represent

892 average of 3 replicates  $\pm$  SD. MA, milk agar; \*\*,  $p < 0.005$ ; \*\*\*,  $p < 0.0005$ ; \*\*\*\*,  $p < 0.0001$ .

893

894

895 **Figure 6**

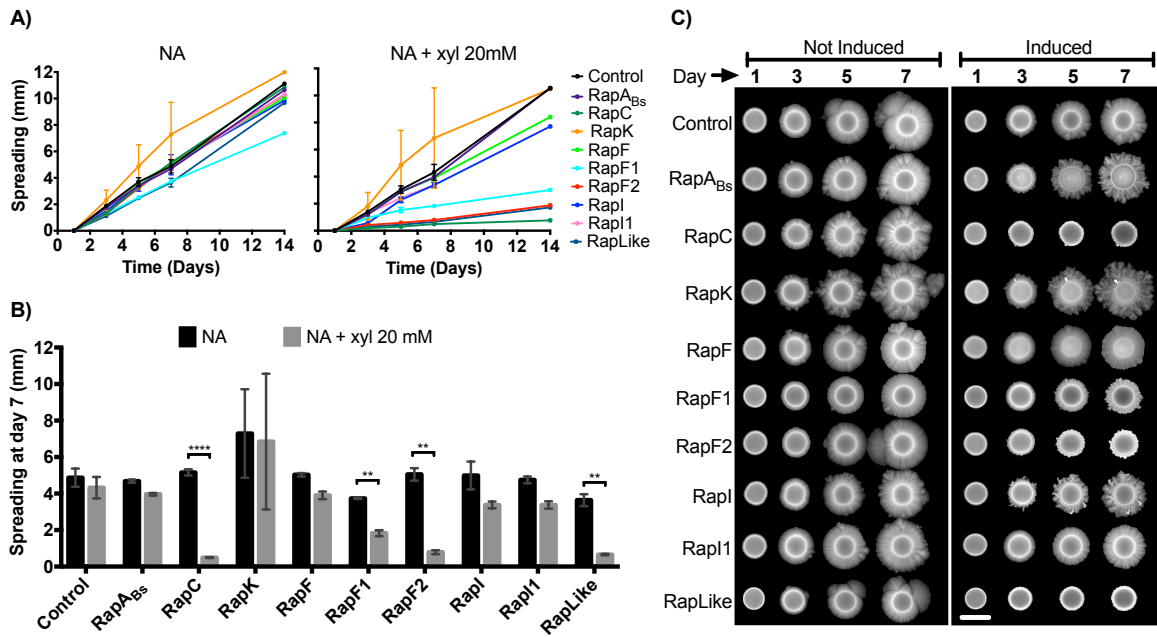

896

897 **Figure 6.** Spreading phenotype of Rap-overexpression strains. A) Spreading kinetics of  
 898 Rap-overexpression colonies on agar. Each point represents the media of triplicates ± SD;  
 899 only one data point is shown at day 14. B) Spreading quantification of Rap-overexpression  
 900 colonies at day 7. Columns represent average of triplicates ± SD. C) Pictures of  
 901 representative Rap-overexpression strains spreading during 7 days. Scale bar indicates 5  
 902 mm. NA, Nutrient Agar; \*\*, p<0.005; \*\*\*\*, p<0.0001.

903

904

905 **Figure 7**

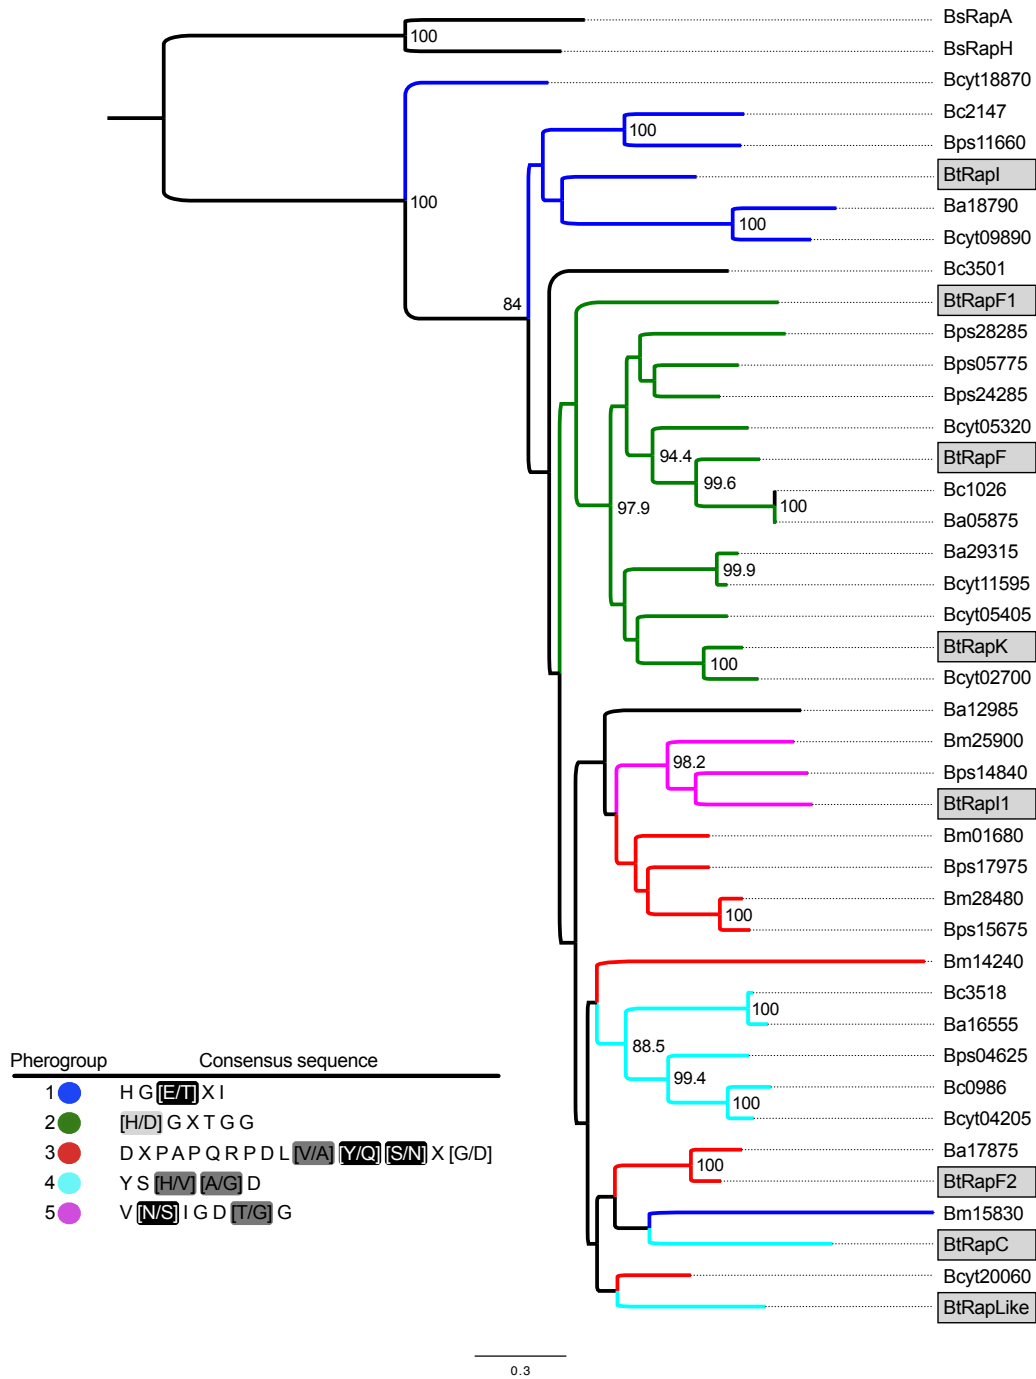

906

907 **Figure 7.** Maximum likelihood phylogeny of Rap proteins from the *B. cereus* group. Rap

908 proteins from Bt8741 are highlighted in gray boxes. Branches from each pherogroup are

909 identified in colors. Bootstraps higher than 80% are shown in each node. Insert table:

910 pherogroups and consensus sequences of mature Phr. Semiconservations in the consensus  
911 sequences are highlighted: black, polar residues; gray, hydrophobic residues; silver, polar  
912 and charged residues.
