1 **Rap-protein paralogs of *B. thuringiensis*: a multifunctional and redundant regulatory**  
2 **repertoire for the control of collective functions.**

3

4 **Gabriela Gastélum<sup>a,b</sup>, Mayra de la Torre<sup>a,b</sup>, Jorge Rocha<sup>c,#</sup>**

5 <sup>a</sup> Centro de Investigación y Desarrollo en Agrobiotecnología Alimentaria, San Agustín

6 Tlaxiaca, Hidalgo, Mexico.

7 <sup>b</sup> Food Science Department, Centro de Investigación en Alimentación y Desarrollo A.C.,

8 Hermosillo, Sonora, Mexico.

9 <sup>c</sup>CONACYT - Centro de Investigación y Desarrollo en Agrobiotecnología Alimentaria, San

10 Agustín Tlaxiaca, Hidalgo, Mexico.

11

12 Running Head: Control of collective functions by Rap proteins in Bt

13 # Address correspondence to Jorge Rocha, [Jorge.rocha@ciad.mx](mailto:Jorge.rocha@ciad.mx)

14

15 **Data Deposition Statement:** Analysis scripts and input files associated with reconstruction

16 of the phylogenetic tree are available at [https://github.com/gabygal6/rap\\_phylogenetics](https://github.com/gabygal6/rap_phylogenetics)

17

18 A file with supplemental material is available.

19

20 **Abstract**

21 Quorum Sensing (QS) are mechanisms of synthesis and detection of signaling molecules to

22 regulate gene expression and coordinate behaviors in bacterial populations. In *Bacillus*

23 *subtilis* (Bs), multiple paralog Rap-Phr QS systems (receptor-signaling peptide) are highly

24 redundant and multifunctional, interconnecting the regulation of differentiation processes  
25 such as sporulation and competence. However, their functions in the *B. cereus* group are  
26 largely unknown. We evaluated the diversification of Rap-Phr systems in the *B. cereus*  
27 group as well as their functions, using *Bacillus thuringiensis* Bt8741 as model. Bt8741  
28 codes for eight Rap-Phr systems; these were overexpressed to study their participation in  
29 sporulation, biofilm formation, extracellular proteolytic activity and spreading. Our results  
30 show that five Rap-Phr systems (RapC, K, F, I and RapLike) inhibit sporulation, two of  
31 which (RapK and RapF) probably dephosphorylate of Spo0F from the Spo0A phosphorelay;  
32 these two Rap proteins also inhibit biofilm formation. Five systems (RapC, F, F2, I1 and  
33 RapLike) decrease extracellular proteolytic activity; finally, four systems (RapC, F1, F2  
34 and RapLike) participate in spreading inhibition. Our bioinformatic analyses showed that  
35 Rap proteins from the *B. cereus* group diversified into five pherogroups, and we foresee  
36 that functions performed by Rap proteins of Bt8741 could also be carried out by Rap  
37 homologs in other species within the group. These results indicate that Rap-Phr systems  
38 constitute a highly multifunctional and redundant regulatory repertoire that enables bacteria  
39 from the *B. cereus* group to efficiently regulate collective functions during the bacterial life  
40 cycle, in the face of changing environments.

41

## 42 **Importance**

43 The *Bacillus cereus* group of bacteria includes species of high economic, clinical,  
44 biological warfare and biotechnological interest, e.g. *B. anthracis* in bioterrorism, *B.*  
45 *cereus* in food intoxications and *B. thuringiensis* in biocontrol. Knowledge on the ecology  
46 of these bacteria is hindered due to our limited understanding about the regulatory circuits  
47 that control differentiation and specialization processes. Here, we uncover the participation

48 of eight Rap quorum-sensing receptors in collective functions of *B. thuringiensis*. These  
49 proteins are highly multifunctional and redundant in their functions, linking ecologically  
50 relevant processes such as sporulation, biofilm formation, extracellular proteolytic activity,  
51 spreading, and probably other additional functions in species from the *B. cereus* group.

52

### 53 **Introduction**

54 Bacteria perform many functions that depend on multicellular-like behaviors, such as cell  
55 differentiation and specialization. These behaviors, also known as collective functions,  
56 allow the emergence of complex ecological interactions, including cooperation and division  
57 of labor in biofilms (1, 2). Collective functions are only evident and effective when  
58 performed by large groups in bacterial populations or communities (3–6). Some of the most  
59 studied examples include bioluminescence by the squid symbiont *Vibrio fischeri* (7), or  
60 fruiting body formation during sporulation of *Myxococcus xanthus* (8).

61

62 In gram-positive bacteria, collective functions and the molecular mechanisms for their  
63 control have been widely studied in *Bacillus subtilis* (Bs). In Bs cultures, several mutually-  
64 exclusive cell-types have been identified (motile, competent, sporulating, cannibal, biofilm  
65 matrix producers, surfactant producers and miners (9, 10)), where emerging ecological  
66 interactions such as cooperation, cheating and cross-feeding, have been described (5, 6, 11).  
67 The presence of these cell differentiation phenomena and the resulting ecological  
68 interactions, ultimately affect the manifestation of collective traits such as sporulation  
69 efficiency, surface colonization, biofilm architecture complexity, etc. (2, 9, 12). These  
70 phenomena depend on global modifications of transcriptional regulation; they are triggered

71 by environmental cues, stress conditions, cell-cell signaling, and are tightly modulated by  
72 complex, overlapping regulatory circuits (13–15).

73

74 Bacteria detect cell density through quorum sensing (QS), which depends on self-produced  
75 signaling molecules that accumulate in the extracellular space as the population grows.  
76 Specific receptors in the cell membrane or in the cytoplasm recognize these signaling  
77 molecules and regulate downstream cellular processes (16–18). Collective traits such as  
78 virulence, competence, sporulation and bioluminescence are regulated by QS. Gram-  
79 positive bacteria use small peptides as signaling molecules for QS (17).

80

81 The RRNPP family (Rgg, Rap, NprR, PlcR, PrgX) are intracellular QS receptors that  
82 regulate several functions across gram-positive bacteria (19–21). Genes coding for receptor  
83 proteins and their associated signaling peptides are encoded in transcriptional cassettes (22).  
84 Rgg, NprR, PlcR and PrgX proteins are transcriptional activators that bind directly to DNA  
85 in quorum state. Rap proteins, however, lack a DNA binding domain and they function by  
86 binding and inhibiting proteins, specifically response regulators and transcriptional  
87 activators (21, 23, 24). Twelve Rap paralogs (RapA, B, C, D, E, F, G, H, I, J, K, 60) control  
88 diverse functions in *B. subtilis* 168 (Bs168). The RapG-PhrG pair regulates the activation  
89 of DegU, a transcriptional regulator that controls *aprE* and *comK* genes encoding for  
90 extracellular proteases and a transcription factor for competence in Bs, respectively (15, 25);  
91 ComA – the master regulator of competence genes – is repressed by RapC, D, F, G, H, K  
92 and Rap60 (14, 26–31); Spo0A – the transcriptional activator of many differentiation genes  
93 – is indirectly regulated by RapA, B, E, H, J, and Rap60 (24, 31–35). Hence, Rap protein

94 paralogs from Bs are highly multifunctional and redundant and they connect several  
95 differentiation processes and coordinate collective traits.

96

97 Spo0A is activated by phosphorylation through a multicomponent phosphorelay system. Up  
98 to five kinases auto-phosphorylate in response to intracellular and environmental stress  
99 signals and transfer the phosphate group to Spo0F, which is then transferred to Spo0B and  
100 finally to Spo0A (36). Spo0A-P activates the transcription of multiple genes, including  
101 biofilm formation (at low concentrations) and early sporulation genes (at high  
102 concentrations (13)). Rap QS proteins prevent the phosphate transfer in the phosphorelay  
103 by binding to Spo0F (32, 37).

104

105 While the regulation of collective traits in Bs is well known, these phenomena remain  
106 largely understudied in the *B. cereus* group, which includes bacteria with clinical and  
107 biotechnological relevance (38). Although Bs and *B. cereus* group species share similar  
108 characteristics such as the sporulation process, the Spo0A phosphorelay components, and  
109 have many protein families in common, they also present notorious genetic differences (39).  
110 In *B. thuringiensis* (Bt, the most widely used biopesticide), the Spo0A phosphorelay is  
111 modulated by the bifunctional QS receptor NprR, which is not present in Bs (40–42). On  
112 the other hand, ComA and DegU response regulators are not encoded in Bt. Additionally,  
113 Rap-Phr QS systems also differ in both groups. These QS systems have evolved by  
114 duplication and divergence mechanisms; even though multiple Rap proteins paralogs are  
115 also found *B. cereus* group species, they have evolved independently and no Rap homologs  
116 are shared between the two groups (43, 44). Therefore, it is not possible to predict the

117 functions of Rap proteins in the *B. cereus* group based on what is known of Rap proteins  
118 from Bs.

119

120 Some Rap-Phr systems from species of the *B. cereus* group have been studied. First, Rap  
121 BXA0205 and BA3790 from *B. anthracis* str. A2012, were demonstrated to regulate  
122 sporulation initiation and to dephosphorylate Spo0F (45). Later, it was shown that Rap8  
123 from Bt-HD73, regulates the sporulation and biofilm formation processes *in vitro* (46). A  
124 more recent study showed the participation of Rap6, 7 and 8 – also known as RapC, K and  
125 RapF, respectively (47) – in the modulation of the sporulation process in Bt407 (48).  
126 However, other Rap paralogs with unknown functions have been identified in the genomes  
127 of *B. cereus* group bacteria (44, 47) that may be relevant to their ecology.

128

129 In this study we aimed at evaluating the diversification of the Rap-Phr systems in the *B.*  
130 *cereus* group as well as their functions, using *Bacillus thuringiensis* Bt8741 as model. We  
131 generated eight Rap-overexpression strains of Bt8741 to evaluate the role of each Rap  
132 paralog in sporulation efficiency, biofilm formation, extracellular proteolytic activity and  
133 spreading. We also studied the evolution of Rap-Phr paralogs in the *B. cereus* group, by  
134 identifying Rap homologs from other species and analyzing its phylogeny. This allowed the  
135 prediction of their functions, based on those of Rap proteins from Bt8741.

136

## 137 **Results**

138 **Spo0F-binding residues from Bs-RapH are conserved in Rap proteins from Bt8741.**

139 In order to predict the capacity of Rap proteins from Bt407 (a strain closely related to  
140 Bt8741) to bind to Spo0F, we analyzed the conservation of the amino acids previously  
141 reported to be involved in Spo0F-binding by RapH from *B. subtilis*. In this analysis, we  
142 included reported sequences of Bs-Rap proteins that bind to Spo0F (RapA, B, E, H, J) as  
143 well as the sequence of RapD from Bs, which does not bind to Spo0F (34) (Fig. 1). We  
144 found more conservation of the functional amino acids of RapH, in the sequences of both  
145 Bs168 and Bt407, compared to the corresponding full sequences (Fig. 1B). In Bs168, the  
146 full sequence conservation of the Rap proteins known to bind to Spo0F (RapA, B, E, J)  
147 compared to RapH, ranged from 59% to 66%, and the functional amino acids conservation  
148 percentage, from 82.3% to 100%. In RapD, which does not bind to Spo0F, the full-length  
149 sequence is conserved at 50% and the functional residues are only 64.7% conserved (Fig.  
150 1B). In the case of Rap proteins from Bt407, the full sequence conservation in comparison  
151 to RapH of Bs168 ranged from 45% to 48%. On the other hand, conservation of the  
152 functional residues ranged from 64.7% to 88.2% (Fig 1B). Since more conservation occurs  
153 in the Spo0F-binding functional residues, these residues could be important for the function  
154 of Bt Rap proteins.

155

156 RapK exhibited the highest conservation percentage of Spo0F-binding residues (88.2%),  
157 followed by RapF, I and RapI1 (82.3%), RapF1, F2 and RapLike (70.5%) and finally RapC,  
158 with 64.6%. Although RapF1 and RapF2 had a high conservation of functional residues,  
159 neither these Rap paralogs, nor RapC, conserve the residue Q47 found in the catalytic site  
160 and previously shown to be essential for the phosphatase activity of RapH (34). This  
161 analysis enables the prediction that some Rap protein paralogs from Bt8741, with a high  
162 conservation percentage of putative Spo0F-binding amino acids, could dephosphorylate

163 Spo0F, while other paralogs could have evolved to participate in other regulatory processes.  
164 Indeed, RapK, RapF and unexpectedly RapC from Bt407, Rap8 from Bt-HD73 (ortholog to  
165 RapI from Bt407) and Rap BXA0205 and BA3790 from *B. anthracis*, (homologs of RapK  
166 and RapF2, respectively) have been shown to participate in the modulation of sporulation  
167 (45, 46, 48). Previous to this work, RapF1, I1, and RapLike from Bt407 (or its homologs in  
168 other species), had not been tested for their role in sporulation.

169

### 170 **RapC, K, F and RapLike control sporulation in Bt8741.**

171 We constructed nine Rap-overexpression strains in the Bt8741 background (Table S1), one  
172 for each endogenous Rap protein identified in Bt407 (RapC, K, F, F1, F2, I, I1, Like) and  
173 one more for RapA from Bs168 (RapA<sub>Bs</sub>). We also generated a control strain of Bt8741  
174 carrying the empty plasmid pHT315-P<sub>xyIA</sub> (Table S1). DNA sequencing showed correct, in-  
175 frame insertion of P<sub>xyIA</sub> and *rap* genes in the pHT315 plasmid (not shown). We followed a  
176 growth time-course experiment of all strains in shaking flasks for 24 hours and confirmed  
177 that neither xylose addition, nor Rap overexpression, affected bacterial growth (Fig. S1).

178

179 In order to identify the Rap proteins involved in the regulation of sporulation initiation, we  
180 studied the effect of Rap overexpression in the sporulation efficiency of each strain. In this  
181 experiment, we observed that both addition of xylose to the culture medium and the  
182 presence of *rap* genes in the plasmid had minor effects on total and thermoresistant CFU  
183 counts of Bt8741 at 72 h. In the control strain, addition of xylose caused a decrease of  $\approx 1$   
184 log<sub>10</sub> in total and thermoresistant CFU (Fig. S2A and S2B). Similarly, when *rapF1* and  
185 *rapF2* genes were carried in the plasmid – but not overexpressed – total CFU decreased by  
186 up to one logarithm of CFU in comparison to the control strain (Fig. S2A). Additionally,



187 sporulation decreased one logarithm in strains carrying *rapF1*, *rapF2* and *rapI1* in  
188 comparison to the control strain when overexpression was not induced (Fig. S2C). These  
189 unspecific effects were probably related to basal expression from the  $P_{xyIA}$  promoter, even  
190 when xylose is not added, since pHT315 replicates at 15 copies per cell (49). However, the  
191 most dramatic effect was found in thermoresistant CFU of strains overexpressing Rap  
192 proteins (Fig. S2D).

193

194 In spite of the unspecific effect of xylose addition on growth and sporulation, sporulation  
195 efficiency of the control strain remained unchanged by the addition of inducer (Fig. 2). In  
196 contrast, overexpression of  $RapA_{Bs}$  caused a decrease in sporulation efficiency from 7.9%  
197 to 0.0005%. In fact, thermoresistant CFU were undetectable when  $RapA_{Bs}$  was  
198 overexpressed (Fig. S2D). We also found undetectable levels of spores in strains  
199 overexpressing RapK and RapF (Fig. S2D). Sporulation efficiency decreased from 32.93%  
200 to 0.0002% in the strain overexpressing RapK and from 9.24% to 0.0026% in the strain  
201 overexpressing RapF (Fig. 2). In Bs, RapA dephosphorylates Spo0F in the Spo0A  
202 phosphorelay (32) and this result indicates that it performs the same function in B8741;  
203 furthermore, it suggests that RapK and RapF carry out the same mechanism for regulation  
204 of sporulation initiation.

205

206 Strains carrying  $P_{xyIA}$ '*rapC* and  $P_{xyIA}$ '*rapLike* also exhibited reduced sporulation efficiency  
207 when xylose was added to the medium. Sporulation efficiency decreased from 5.43% to  
208 0.0357% and from 12.34% to 0.1352% when RapC and RapLike were overexpressed,  
209 respectively (Fig 2). Additionally, RapI overexpression slightly decreased sporulation

210 efficiency, from 2.82% to 0.51%. Sporulation efficiency was not decreased by the  
211 overexpression of either RapF1, F2, I or RapI1.

212

213 Samples of the Rap-overexpressing strain cultures at 72 h were observed in a microscope.

214 We detected free spores and bacterial debris in all cultures, when Rap proteins were not

215 overexpressed (Fig. S3). Figure 3 shows representative fields of view with cells from each

216 induced culture. Strains overexpressing Rap proteins that did not affect sporulation

217 efficiency (RapF1, F2 I1) showed cell morphology similar to that of the control strain, i.e. a

218 sporulated bacilli with defined endospores. In samples from strains overexpressing RapA<sub>BS</sub>,

219 K and RapF, that had acutely decreased sporulation efficiency, we observed chained,

220 wrinkled cells with no spores (Fig. 3). On the other hand, cells from strains overexpressing

221 RapC and RapLike, were observed as rod-shaped and no spores were evident (Fig. 3).

222 Finally, in cells from the strain overexpressing RapI, which had a slight effect on

223 sporulation efficiency, cell morphology was similar to strains overexpressing RapF1, F2, I1

224 and the control strain (Fig. 3), showing a defined endospore.

225

### 226 **Overexpression of RapF and RapK prevents biofilm formation of Bt8741.**

227 In nature, over 80% of bacteria live in biofilms (49), therefore, biofilm formation is likely a

228 relevant trait – albeit an understudied one – during the life cycle of Bt and other bacteria

229 belonging to the *B. cereus* group. To determine which Rap proteins were involved in the

230 regulation of biofilm development in Bt8741, we quantified biofilm formation of the Rap-

231 overexpression strains in the air-liquid interphase at 48 h. For this, we suspended the cells

232 from the biofilm and measured optical density (OD<sub>600</sub>). Since 20 mM of xylose in the

233 media caused a complete inhibition of biofilm formation in the Bt8741 control strain (not

234 shown), we first tested the effect of xylose concentration on this phenotype. We found that  
235 biofilm formation was not affected at 2 mM, but was decreased at higher concentrations of  
236 5, 10 and 15 mM (Fig. S4); therefore, overexpression of Rap proteins was performed with 2  
237 mM of xylose (50).

238

239 Overexpression of RapK and RapF caused an inhibition of biofilm formation of Bt8741  
240 (Fig. 4A), evident by the significant decrease ( $p < 0.0001$ ) in the  $OD_{600}$  measured from a  
241 sample obtained from the surface of the culture (Fig. 4B). The  $OD_{600}$  of the biofilms  
242 decreased from 0.7115 to 0.0977 and from 0.6577 to 0.0961 in strains overexpressing  
243 RapK and RapF, respectively (Fig. 4B). On the other hand, biofilms were normally formed  
244 by strains overexpressing RapA<sub>Bs</sub>, C, F2, I, I1 and RapLike (Fig. 4). Interestingly, the strain  
245 overexpressing RapF1 was unable to form biofilms even when  $P_{xyIA}$  *rapF1* was not induced  
246 (Fig. 4A and B).

247

248 In order to discard possible global growth defects in this assay when RapK and RapF were  
249 overexpressed, we measured planktonic growth through  $OD_{600}$  of the liquid culture media  
250 from the same experiments where biofilm formation was assessed. We found that  
251 planktonic growth was higher in conditions where a biofilm was not formed (Fig. S5). This  
252 suggests that RapK and RapF specifically inhibit biofilm formation (e.g. secretion of  
253 extracellular matrix components).

254

255 **Extracellular proteolytic activity is downregulated by RapC, F, F2, I1 and RapLike in**  
256 **Bt8741.**

257 In *Bt*, the production of extracellular proteases is crucial during its necrotrophic phase, i.e.  
258 development in insect cadavers. We tested the role of Rap proteins in extracellular  
259 proteolytic activity by measuring the effect of Rap overexpression on hydrolysis halos of  
260 colonies on milk agar (MA) plates. Addition of xylose in the media had no effect ( $p>0.05$ )  
261 on the hydrolysis halo of the control strain (Fig. 5). In contrast, overexpression of RapC, F,  
262 F2, I1 and RapLike decreased the halo area ( $p<0.05$ ; Fig. 5B). In these strains, the halo area  
263 decreased to 41.98%, 37.81%, 46.65%, 47.51% and 34.93%, respectively (Fig. 5B, Fig. S6)  
264 compared to the halos in plates where overexpression was not induced (100%). Proteolytic  
265 activity of strains overexpressing RapA<sub>Bs</sub>, K, I and RapF1 was not affected by the induction  
266 ( $p>0.05$ ; Fig. 5A and B).

267

#### 268 **RapC, F1, F2 and RapLike regulate spreading of Bt8741 colonies.**

269 Colonies of Bt8741 present a spreading phenotype that could be associated to its capacity to  
270 colonize hosts and habitats. Similar passive motility phenotypes have been described in  
271 other species of *Bacillus*, associated to the production of extracellular surfactant molecules  
272 (51–53). To gain insights on this understudied collective trait, we determined the effect of  
273 Rap protein overexpression on radial spreading of colonies of Bt8741 growing on agar  
274 media.

275

276 We observed that addition of xylose in the media did not affect the spreading of the control  
277 strain (Fig. 6). In contrast, the overexpression of RapC, F1, F2 and RapLike caused a  
278 decrease in spreading ( $p<0.05$ ) of Bt8741 colonies at day 7 (Fig. 6A and B). The  
279 overexpression of RapC reduced the colony dispersion from 5.15 mm to 0.49 mm  
280 (reduction of 90.4%); RapF1, from 3.73 mm to 1.83 mm (decrease of 50.9%); RapF2 from

281 5.05 mm to 0.78 mm (decrease of 84.5%); and RapLike from 3.64 mm to 0.65 mm  
282 (decrease of 82.1%) (Fig. 6B). Spreading inhibition is evident in the colony morphology of  
283 these strains (Fig. 6C). We observed that the overexpression of RapC, F2 and RapLike,  
284 completely eliminated this phenotype, while overexpression of RapF1 only decreased  
285 spreading ( $p < 0.05$ ) (Fig. 6B and C).

286

287 The overexpression of RapA<sub>Bs</sub>, K, F, I and RapI1 did not affect the spreading of Bt8741  
288 ( $p > 0.05$ ) (Fig. 6B). Spreading of the strains carrying overexpression plasmids for these Rap  
289 proteins ranged from 4.68 mm to 7.29 mm without induction and from 3.37 mm to 6.84  
290 mm when induced (Fig. 6B). In some cases, Rap overexpression affected colony  
291 morphology, i.e. colonies of strains overexpressing RapABs, RapK and RapI showed an  
292 increased dendritic phenotype; however, the spreading phenotype measured as colony  
293 radius, was still present (Fig. 6C).

294

### 295 **Rap-Phr systems diversified into five pherogroups in the *B. cereus* group.**

296 In order to predict the functions of Rap paralogs in *B. cereus* (Bc), *B. anthracis* (Ba), *B.*  
297 *mycooides* (Bm), *B. pseudomycooides* (Bps) and *B. cytotoxicus* (Bcyt), we analyzed their  
298 sequences to deduce the evolution of Rap proteins in these species and identify their  
299 putative signaling peptide sequences (mature Phr). Additional to the 8 *rap* genes in Bt407  
300 (of which 4 are located in the chromosome, and 4 in plasmids) we found 32 *rap-phr*  
301 systems in the *B. cereus* group (Table S2), 30 of which are located in the chromosome and  
302 2 in plasmids (Table 1).

303

304 The phylogeny of Rap proteins from the *B. cereus* group shows that clades are composed of  
305 Rap proteins from different species, i.e., phylogenetically close Rap homologs can be found  
306 in different species. This suggests that Rap-Phr divergence occurred before speciation in  
307 this group (Fig. 7). Hence, it is possible that Rap functions uncovered in this work could be  
308 extrapolated to the rest of the *B. cereus* group, e.g. Rap proteins found in the same clade as  
309 BtRapK and BtRapF (Bps28285, Bps05775, Bps24285, Bcyt05320, Bc1026, Ba05875,  
310 Ba29315, Bcyt11595, Bcyt05405 and Bcyt02700) may modulate sporulation initiation and  
311 biofilm formation. Since we found that several Rap paralogs are coded in every species of  
312 the *B. cereus* group, we suggest that they could regulate a variety of collective functions in  
313 all these species, as we describe here for Bt8741.

314

315 We identified 5 pherogroups, each with a putative mature Phr peptide consensus sequence.  
316 All five pherogroups include Rap proteins from different species (Fig. S7). These five  
317 pherogroups are identified with colors in the branches of the phylogeny in figure 7. We  
318 found that the mature Phr corresponding to pherogroups 1 and 2 are located at the C-  
319 terminal domain of the pro-peptides (exported Phr sequence). RapI, F, F1 and RapK from  
320 Bt are found at these pherogroups. On the other hand, for pherogroup 3 – where RapF2  
321 from Bt is found – consensus sequences are located at the N-terminal domain of the pro-  
322 peptide. Finally, putative mature Phr peptides from pherogroups 4 and 5 – which include  
323 RapLike, C and RapI1 from Bt – are located in the middle of the exported sequence (Table  
324 S3). We observed that only Bt and Bps encode Rap proteins from all five pherogroups; Rap  
325 proteins from Ba and Bcyt are found in pherogroups 1, 2, 3 and 4; Rap proteins in Bm  
326 correspond to pherogroups 1, 3 and 5; Rap proteins from Bc are found only in pherogroups  
327 1 and 4 (Fig. 7). Pherogroup 1 is the only one present in all evaluated species.

328

## 329 **Discussion**

330 Few studies have addressed multicellular behaviors such as differentiation, cell-  
331 specialization, collective functions, and the resulting ecological interactions in species from  
332 the *B. cereus* group (11, 54). Similarly, molecular mechanisms for the control of  
333 differentiation processes in the *B. cereus* group bacteria remain understudied (45, 46, 48, 54,  
334 55). Here we show that Rap-Phr systems in Bt8741 regulate collective functions such as  
335 sporulation, biofilm formation, production of extracellular proteases and spreading motility.  
336 In fact, Rap-Phr systems in this strain are highly multifunctional and redundant, since five  
337 out of eight Rap paralogs modulate more than one collective trait, and all four collective  
338 traits studied were inhibited by more than one Rap protein. Hence, Rap paralogs appear to  
339 constitute a regulatory repertoire that allows Bt populations to respond efficiently to  
340 environmental changes, which contributes to fitness of the population.

341

342 Although it is well known how the Rap-Phr systems participate in differentiation processes  
343 of the gram-positive model bacteria Bs, speciation resulted in divergent Rap proteins in the  
344 *B. cereus* and *B. subtilis* groups (43, 44). Therefore, no homologs are shared between the  
345 groups; however, in both cases, speciation resulted in the presence of multiple Rap paralogs  
346 per genome. We propose that Rap proteins that are phylogenetically close to Rap proteins  
347 from Bt8741, could have the same functions in other bacteria of the *B. cereus* group.

348

349 It is not yet clear how bacteria benefit from keeping multiple receptor-signaling peptide  
350 gene pairs comprising this complex signaling network of Rap-Phr systems; however, it has  
351 been shown that redundancy in Rap-Phr systems in Bs has been selected for because it

352 provides social advantages (56). Because Rap proteins have a repressive function upon its  
353 target, the gain of a novel Rap-Phr system for the regulation of extracellular public good  
354 production enables a facultative cheating mechanism in which variants with an extra system  
355 exploit their ancestral strain. Here we showed that extracellular public goods such as  
356 biofilm matrix components, extracellular proteases or surfactants, are likely controlled by  
357 Rap proteins in Bt8741; therefore, the same facultative cheating mechanism could be  
358 expected during duplication of *rap-phr* genes in the *B. cereus* group. This represents a  
359 selective advantage by a fitness increase of the novel population. Multifunctionality seems  
360 to have evolutionary advantages as well. Perhaps, because Rap-Phr systems are known to  
361 be parallel signaling pathways (44) they are not all activated simultaneously; instead, some  
362 of them may be active only under specific conditions, achieving the regulation of various  
363 differentiation processes and collective functions while optimizing energetic costs. Overall,  
364 keeping multiple redundant and multifunctional Rap paralogs that control important  
365 collective functions results in a better adaptation and population survival in nature.

366

367 Sporulation in the *Bacillus* genus is essential for bacterial survival and dissemination in  
368 their habitats; it is also important for the biotechnological uses of *Bacillus* species. Six Rap-  
369 Phr systems from Bs, including RapA, negatively regulate Spo0A phosphorelay by  
370 dephosphorylating Spo0F, and therefore prevent the activation of Spo0A (32). We found  
371 that RapA<sub>Bs</sub>, retained this function when it was overexpressed in Bt8741. Furthermore, five  
372 Rap-Phr systems from Bt8741 (RapK, F, C, Like and RapI) also regulate sporulation in this  
373 species. We propose that RapK and RapF may function by dephosphorylating Spo0F,  
374 similar to the mechanism carried out by RapA in Bs. This suggestion is supported by three  
375 findings: 1) both RapK and RapF retain the highest conservation of Spo0F binding residues



376 from RapH, including the catalytic residue Q47; 2) their overexpression resulted in  
377 undetectable number of spores, similar to RapA<sub>Bs</sub> overexpression; 3) the overexpression of  
378 RapA<sub>Bs</sub>, K and RapF caused an identical cell morphology in the three overexpressing  
379 strains. Additionally, RapK and RapF are closely related and both belong to pherogroup 2,  
380 which may indicate that they resulted from a gene duplication event of a Rap ancestor that  
381 dephosphorylated Spo0F. Other Rap proteins that decreased sporulation efficiency are  
382 RapC, Like and RapI; of these, RapC does not contain the catalytic site residue Q47.  
383 Further studies are needed in order to elucidate the mechanisms by which all these  
384 receptors regulate sporulation in Bt and other species from the *B. cereus* group.

385

386 RapK and RapF are the only Rap proteins from Bt8741 that prevented biofilm formation.  
387 Because Spo0A-P levels regulate both sporulation and biofilm formation in Bs, we  
388 speculate that bifunctionality of RapK and RapF in Bt8741 results from their activity on  
389 Spo0F. We noted, however, that the overexpression of RapA<sub>Bs</sub>, which completely  
390 prevented sporulation, did not affected biofilm formation in Bt. Overexpression of RapA<sub>Bs</sub>  
391 may allow low levels of Spo0A-P in Bt8741, which in Bs are sufficient for the activation of  
392 genes related to production of extracellular matrix components, but not for the activation of  
393 early sporulation genes (13). This picture is probably more complex, as different feedback  
394 loops modulate sporulation and biofilm formation (57). It is noteworthy that overexpression  
395 of RapA<sub>Bs</sub>, in Bt8741 did not inhibit any phenotype, other than sporulation; this reflects the  
396 fact that Rap proteins co-evolve with specific protein targets in each bacterial species; it  
397 also indicates that Rap target regulators involved in the control of extracellular proteases  
398 and spreading may not be conserved between Bs and the *B. cereus* group.

399

400 We suggest that Rap proteins have diversified according to the ecological needs of each  
401 species. For example, Bs is a soil dwelling bacteria found associated to rhizosphere forming  
402 biofilms (58). In Bs, six Rap proteins modulate Spo0A-P levels (21, 59), affecting  
403 sporulation and biofilm formation. Here we demonstrate that five Rap proteins modulated  
404 sporulation (RapC, K, F, I and RapLike) while only two of these (RapK and RapF) affected  
405 biofilm formation, perhaps through the Spo0A phosphorelay. This highlights the  
406 importance of sporulation regulation in both species and that probably, biofilm formation is  
407 not as essential in the lifecycle of Bt, as it is in Bs. In contrast, Bt is a soil inhabitant, insect  
408 pathogenic and necrotrophic bacteria (60). In this species, extracellular protease production  
409 is essential for nutrient scavenging, which is normally associated to the necrotrophic stage  
410 of bacterial development in the insect cadaver (40). Additionally, it could be relevant  
411 during the transition from exponential growth to stationary phase in controlled  
412 fermentations or for adaptation against fluctuations in nutrient availability in the  
413 environment. While only one of the twelve Rap proteins from Bs modulates its extracellular  
414 proteolytic activity (RapG) (25), Bt has extended the modulation of extracellular protease  
415 production to five Rap-Phr systems (RapC, F, F2, I1 and RapLike).

416

417 We found that the Spo0A phosphorelay and production of extracellular proteases are highly  
418 interconnected in Bt8741 through the functions of RapC, F and RapLike. Additionally,  
419 extracellular proteolytic activity (specifically the NprA protease) is regulated by the QS  
420 system NprR-NprRB (61), which is also involved in the modulation of the Spo0A  
421 phosphorelay (41, 42). Likewise, NprR also participates in the spreading phenotype of  
422 Bt8741 (A. Verdugo *et. al*, unpublished data), as well as RapC and RapLike. Because  
423 sporulation, extracellular protease production and spreading of Bt have evolved to be

424 regulated and coordinated by multiple QS systems, these collective traits may be important  
425 in the life cycle of Bt and represent essential mechanisms for its ecology.

426

427 Mature Phr signaling peptides from Bs correspond to at least five residues located in the C-  
428 terminal end of the pro-Phr or in the middle of the sequence. Sequence analyses of mature  
429 Phrs in Bs have shown that a basic amino acid is found in the second position from the N-  
430 terminal end, and an alanine residue is necessary in the position before the cleavage site for  
431 Phr maturation (22, 62, 63). Our analysis of consensus putative mature Phr sequences  
432 showed that these characteristics are not maintained in mature Phr peptides of the *B. cereus*  
433 group. This suggests that signaling peptides are processed differently in these bacteria, i.e.,  
434 using different sets of extracellular proteases and peptidases that recognize distinct  
435 sequences. In Bt, the identity of a mature Phr has only been shown for Rap8-Phr8 from Bt-  
436 HD73. In this case, the active heptapeptide YAHGKDI is located in the C-terminal end  
437 from its exported sequence (46). RapI from Bt8741, ortholog protein to Rap8, is found in  
438 pherogroup 1, in which the consensus sequence HGKDI corresponds to the five residues in  
439 the C-terminal end from the exported sequence. This indicates that the consensus sequences  
440 determined in this study may not exactly predict the signaling peptide sequence, but they  
441 can direct their search in future studies.

442

443 We found that Rap-Phr systems in the *B. cereus* group have evolved into five pherogroups,  
444 each including Rap homologs from different species. This means that signaling peptides  
445 shared by more than one species, could mediate crosstalk or eavesdropping phenomena in  
446 nature, allowing the regulation of collective functions in response to interspecific signals as  
447 described for other gram-positive species (64, 65).

448

449 The *B. cereus* group comprise bacteria with clinical and biotechnological relevance such as  
450 Ba, Bc, Bt, and other environmental and facultative species (38). We show that Rap-Phr QS  
451 systems in Bt are involved in the regulation of ecologically important collective traits, and  
452 our findings are highly relevant for further studies about the *B. cereus* group and contribute  
453 to the knowledge about its ecology. Understanding the regulatory processes for cell  
454 differentiation and specialization in these bacteria may enhance the use of  
455 biotechnologically-relevant species, or the strategies to control human pathogens, through  
456 the intervention of their collective functions at the molecular level. For instance, Ba and Bc  
457 are known for their pathogenic nature against mammals; therefore, elucidating the role of  
458 Rap-Phr systems in the production of virulence factors of these species such as anthrax  
459 toxin and capsule of Ba, or enterotoxins of Bc, could be of high relevance. Additionally, it  
460 is known that QS systems can be synthetically engineered (66, 67). As a result, Rap-Phr  
461 systems could be manipulated in order to enhance Bt survival, insect pathogenesis or cry  
462 protein production. This work serves as a starting point for the study of cell specialization  
463 of the *B. cereus* group bacteria.

464

## 465 **Materials and Methods**

### 466 **Bacterial strains, media and culture conditions**

467 *Bacillus thuringiensis* strain 8741 (Bt8741) (43), derived from Bt407 (Acc. No.  
468 NC\_018877.1, 51), was used as host for the overexpression of Rap proteins. *Bacillus*  
469 *subtilis* strain 168 (Bs168) was used for the amplification of *rapA*. *Escherichia coli* strain  
470 TOP10 (69) was used for construction and cloning of overexpression plasmids before  
471 transforming into Bt8741. Luria-Bertani (LB) broth (10 g L<sup>-1</sup> tryptone, 5 g L<sup>-1</sup> yeast extract

472 and 5 g L<sup>-1</sup> NaCl) and Nutrient Agar (8 g L<sup>-1</sup> nutrient broth, 15 g L<sup>-1</sup> agar) were used at 30  
473 °C for *Bacillus* cultures and at 37 °C for *E. coli* and 200 rpm for liquid cultures. Milk Agar  
474 was prepared using Nutrient Agar, supplemented with 5% skim milk (41). When needed,  
475 ampicillin (100 µg mL<sup>-1</sup>) or erythromycin (5 µg mL<sup>-1</sup>) was added to media. To induce  
476 expression from the *xylA* promoter in Bt8741, xylose was used to a final concentration of  
477 20 mM (70), unless otherwise specified.

478

#### 479 **Analysis of putative Spo0F-binding amino acids in Raps from Bt407**

480 Based on the RapH residues involved in Spo0F binding in Bs168 (34) we determined the  
481 conservation of the corresponding residues in Raps from Bt407, in order to predict their  
482 capacity to bind to Spo0F. First, we analyzed the conservation of full-length Rap proteins  
483 from Bs168 and Bt8741 in comparison to RapH from Bs168. For this, we performed  
484 pairwise alignments of RapH amino acid sequence (NP\_388565.2) with RapA  
485 (NP\_389125.1), RapB (NP\_391550.1), RapE (NP\_390460.2), RapJ (NP\_388164.1), RapD  
486 (NP\_391519.1) from Bs168, and each of the eight Raps from Bt407 (AFV21721.1,  
487 AFV22194.1, AFV22088.1, AFV16731.1, AFV19251.1, AFV22208.1, AFV16776.1,  
488 AFV17466.1), using the BlastP tool (71). Then, all sequences were aligned together using  
489 MAFFT version 7 online service (72) with the G-INS-i iterative refinement method (73).  
490 Finally, we identified in the alignment the amino acids of Rap protein sequences that  
491 correspond to the residues of RapH that participate in binding and dephosphorylation of  
492 Spo0F.

493

#### 494 **DNA manipulation**

495 All primers used in this study are listed in Table S4. DNA was isolated from Bs168 and  
496 Bt8741 using the PureLink Genomic DNA Mini Kit (Invitrogen, Carlsbad CA, USA).  
497 QIAprep Spin Miniprep Kit (Qiagen, Germantown, MD, USA) was used routinely for  
498 plasmid extraction and purification. Oligonucleotides were designed for amplifying each  
499 Rap gene from Bt8741 genome or plasmids (Acc. No. NC\_018877.1, NC\_018883.1,  
500 NC\_018886.1, NC\_018879.1, NC\_018878.1) and Bs168 genome (Acc. No. NC\_000964.3),  
501 and synthesized as a commercial service (T4 Oligo, Irapuato, Mexico). PCR products and  
502 restriction reactions were purified using the PureLink Quick PCR Purification Kit  
503 (Invitrogen). When needed, PCR products were isolated from 0.8% agarose gels using the  
504 Zymoclean<sup>TM</sup> Gel DNA Recovery Kit (ZYMO Research, Irvine, CA, USA). Enzymes  
505 Dream Taq Master Mix, *HindIII*, *Sall* (Thermo Scientific, Waltham, MA, USA), *PstI* and  
506 T4 DNA Ligase (New England Biolabs Inc., Ipswich, MA, USA) were used as  
507 recommended by the manufacturer.

508

### 509 **Construction of Rap-overexpression Bt8741 strains**

510 All strains and plasmids used in this study are listed in Table S1. For the construction of the  
511 overexpression plasmid pHT315- $P_{xylA}$ , the regulatory region of the xylose operon, including  
512 the *xylA* promoter ( $P_{xylA}$ ) and the repressor gene *xylR*, were amplified by PCR from Bs168  
513 genome using primers GG1 and GG2 (Table S4). This PCR product was inserted into the  
514 *HindIII* and *PstI* sites of pHT315 plasmid (74), and colonies were PCR checked using  
515 primers DS16 and DS17 (Table S4). The resulting plasmid pHT315- $P_{xylA}$  was transformed  
516 into *E. coli* Top10 competent cells. Then, this plasmid was used for the inducible  
517 overexpression of Rap proteins with xylose in Bt8741. For this, *rap* genes encoded in the  
518 genome of Bt8741 (*rapC*, *rapK*, *rapF*, *rapF1*, *rapF2*, *rapI*, *rapII* and *rapLike*, 47) and

519 *rapA* from Bs168 (RapA<sub>Bs</sub>, 32) were amplified using the corresponding primers pairs listed  
520 in Table S4, and inserted in-frame between the *PstI* and *Sall* sites of pHT315-P<sub>xyLA</sub>. Nine  
521 overexpression plasmids, one for each Rap protein, were transformed into *E. coli* Top10  
522 competent cells. All plasmids were then transformed into Bt8741 electrocompetent cells,  
523 using the protocol described in previous studies (41), generating nine Bt8741 strains for the  
524 overexpression each Rap protein. Additionally, we transformed Bt8741 with the pHT315-  
525 P<sub>xyLA</sub> (without a *rap* gene), and the resulting strain was used as control strain throughout the  
526 Rap induction experiments. The complete sequence of pHT315-P<sub>xyLA</sub>'*rapI* was verified by  
527 Illumina sequencing (MGH DNA Core, Cambridge, MA, USA), and the rest of the  
528 P<sub>xyLA</sub>'*rap* constructions were verified by Sanger sequencing (Unidad de Servicios  
529 Genómicos, LANGEBIO-CINVESTAV, Irapuato, Mexico) using primers GG26 and DS17  
530 (Table S4).

531

### 532 **Sporulation efficiency**

533 We assessed the effect of the overexpression of Rap proteins on sporulation efficiency in  
534 Bt8741. Preinoculums were prepared by picking a single colony of each strain into 5 mL of  
535 liquid media and grown overnight. Then, 1 mL of preinoculum was centrifuged, washed  
536 and suspended in 1 mL of sterile PBS. Glass culture tubes (25 mm diameter) with 5 mL of  
537 LB with erythromycin were inoculated with 50  $\mu$ L (1% v/v) of preinoculum containing  
538  $\approx 10^7$  cfu ml<sup>-1</sup> and incubated for 72 h. All strains were cultured in triplicate, in LB with and  
539 without the addition of xylose. To determine growth and sporulation, total and  
540 thermoresistant CFU were calculated by plating 10-fold serial dilutions in nutrient agar. For  
541 thermoresistant CFU, samples of 100  $\mu$ L were incubated at 80 °C for 20 min prior to

542 diluting and plating. Sporulation efficiency was calculated as the percentage of  
543 thermoresistant CFU in total CFU.

544

#### 545 **Biofilm formation assay**

546 We evaluated the effect of the overexpression of Rap proteins on the capacity of Bt874 to  
547 form biofilms. For this assay, we used 13 x 100 mm glass tubes with 3 mL Nutrient Broth +  
548 erythromycin, with and without the addition of xylose to a final concentration of 2 mM.  
549 Three  $\mu$ L of preinoculum was added in triplicates, and the inoculated tubes were incubated  
550 without agitation at  $31\text{ }^{\circ}\text{C} \pm 1\text{ }^{\circ}\text{C}$  for 48 hours. The culture media was then removed with a  
551 syringe with needle. The biofilm and ring attached to the wall of the tube, composed of  
552 cells from the biofilm, were suspended in 1.5 mL of sterile PBS and the optical density  
553 ( $\text{OD}_{600}$ ) was measured. The  $\text{OD}_{600}$  was also measured from the removed liquid media to  
554 address planktonic growth. At least 5 replicates of each treatment were performed.

555

#### 556 **Extracellular proteolytic activity assay**

557 To evaluate the effect of Rap overexpression in extracellular proteolytic activity of Bt8741,  
558 2  $\mu$ L of preinoculums of each Rap-overexpression strain, prepared as described above, were  
559 spotted in triplicate on milk agar with and without the addition of xylose. The hydrolysis  
560 halo area was measured after 24 h of incubation using the Image Lab™ Software  
561 (BIORAD). To correct for differences in colony growth, we subtracted the colony area.

562

#### 563 **Spreading phenotype assay**

564 The spreading phenotype of Rap-overexpression Bt8741 variants was followed in colonies  
565 spotted on agar. For this assay, we used diluted nutrient agar (NA) ( $0.8\text{ g L}^{-1}$  Nutrient broth,



566 1.5 g L<sup>-1</sup> agar) with erythromycin and with or without the addition of xylose. Plates were  
567 air-dried inside a biological hood for 60 minutes prior to inoculation. Then, 5 µL of  
568 preinoculum cultures were spotted in the center of the plate, dried for 5 minutes and  
569 incubated at 30 °C for 14 days. The inoculated agar plates were photographed at days 1, 3,  
570 5, 7 and 14, using a gel documentation system (Gel Doc™ XR+, BIORAD). Colony area  
571 was measured using the Image Lab™ Software (BIORAD) and radial growth was  
572 calculated. For normalization of radial dispersion, we subtracted from all observations the  
573 colony radius at day 1, which corresponds to the inoculated droplet area. Three replicates of  
574 each treatment were performed.

575

### 576 **Phylogenetic Analysis**

577 To reconstruct the phylogeny of Rap proteins in the *B. cereus* group, we first selected one  
578 representative strain of each species from NCBI GenBank, including *Bacillus cereus*  
579 ATCC14579 (Accession NC\_004722.1), *Bacillus anthracis* A0248 (NC\_012659.1),  
580 *Bacillus thuringiensis* 407 (NC\_018877.1), *Bacillus mycooides* ATCC6442  
581 (NZ\_CP009692.1), *Bacillus pseudomycooides* DMS12442 (NZ\_CM000745.1) and *Bacillus*  
582 *cytotoxicus* NVH391-98 (NC\_009674.1). Strains were selected based on the availability of  
583 a complete genome (as of July of 2018) and thus, *Bacillus weihenstephanensis* was  
584 excluded. We searched for Rap protein homologs in the selected genomes by querying the  
585 amino acid sequence of *B. subtilis* RapA (NP\_389125.1) and each of the eight Rap  
586 sequences of *B. thuringiensis* 407: RapC (AFV21721.1), RapK (AFV22194.1), RapF  
587 (AFV22088.1), RapF1 (AFV16731.1), RapF2 (AFV19251.1), RapI (AFV22208.1), RapI1  
588 (AFV16776.1) and RapLike (AFV17466.1). Homologs were searched using BLAST tool  
589 (71), the tBlastn tool and a local script designed for performing the blast search in an

590 assembled database of the selected genomes. To ensure the identity of the Rap protein  
591 homologs, Blast hits were submitted manually to the Conserved Domain Search-NCBI tool  
592 (75) in order to determine if they presented the characteristic TPR-containing domain. Rap  
593 protein amino acid sequences were aligned in MAFFT version 7 (72) using the G-INS-i  
594 iterative refinement method which incorporates pairwise alignment algorithms (73). RapA  
595 and RapH from Bs168 were also included as outgroups for the phylogenetic reconstruction.  
596 The selection of the best substitution evolutionary model (JTT+G+I+F) was made using the  
597 Smart Model Selection with the Akaike Information Criterion in PhyML 3.0 (76, 77), as  
598 well as the phylogeny reconstruction by the Maximum Likelihood method using 1000  
599 bootstraps to support the phylogenetic prediction.

600

#### 601 **Phr pro-peptide identification and pherogroup prediction**

602 Additional to the identification of Rap homologs in the *B. cereus* group, we also analyzed  
603 the putative *phr* genes, which code for pro-Phr, the precursor of the quorum sensing signal  
604 peptide. For this, we performed a manual search targeting open reading frames (ORFs)  
605 between 30 and 100 amino acids of length, downstream from the *rap* gene sequences.  
606 When present, each Phr amino acid sequence was analyzed for the presence of a signal  
607 peptide for secretion and a cleavage site using SignalP4.1 (78). The putative mature  
608 signaling peptide (mature Phr) and pherogroup prediction were performed from the  
609 exported Phr amino acid sequences (pro-Phr). For this, Phrs corresponding to Rap proteins  
610 from different clades of the phylogenetic reconstruction were analyzed separately. The  
611 amino acid sequences of the pro-Phr from each clade were aligned using ClustalW (79).  
612 Pherogroups were identified by manually, by modifying the groups of aligned Phrs and  
613 looking for consensus sequences in the alignments. For better identification of consensus

614 sequences, sequence Logos were created for each pherogroup using the Seq2Logo 2.0  
615 online service (80).

616

## 617 **Statistics**

618 All the statistical analyses were performed using GraphPad Prism version 7.0a. Data  
619 obtained from the extracellular proteolytic activity assay, spreading (at day 7) and biofilm  
620 formation were analyzed with multiple *t*-tests to search for differences between not induced  
621 and induced Rap protein overexpression conditions of each strain. Significance of 0.05 was  
622 used in all statistical tests.

623

## 624 **Acknowledgements**

625 Authors thank all members of the Microbe-Plant Interactions group at CIDEA for their  
626 comments and suggestions. We gratefully acknowledge Gabriela Olmedo-Álvarez for her  
627 contributions in analyses of phylogenetic data, suggestions throughout the development of  
628 the experimental work and critical review of the manuscript. Bernardo Aguilar and Enrique  
629 Hurtado contributed with technical assistance in the phylogenetic analyses. GG Received a  
630 scholarship 636324 from Conacyt. This work was partially funded by Conacyt (Fomix  
631 267837 and Fordecyt 296368) for MT.

632

## 633 **References**

- 634 1. Crespi BJ. 2001. The evolution of social behavior in microorganisms. *Trends Ecol*  
635 *Evol* 16:178–183.
- 636 2. Vlamakis H, Aguilar C, Losick R, Kolter R. 2008. Control of cell fate by the  
637 formation of an architecturally complex bacterial community. *Genes Dev* 22:945–

- 638 953.
- 639 3. Shapiro JA. 1998. Thinking about bacterial populations as multicellular organisms.  
640 *Annu Rev Microbiol* 52:81–104.
- 641 4. Jeckel H, Matthey N, Drescher K. 2019. Biophysics: Common concepts for bacterial  
642 collectives. *Elife* 8:e47019.
- 643 5. van Vliet S, Ackermann M. 2015. Bacterial Ventures into Multicellularity:  
644 Collectivism through Individuality. *PLoS Biol* 13:1–5.
- 645 6. Claessen D, Rozen DE, Kuipers OP, Søgaard-Andersen L, Van Wezel GP. 2014.  
646 Bacterial solutions to multicellularity: A tale of biofilms, filaments and fruiting  
647 bodies. *Nat Rev Microbiol* 12:115–124.
- 648 7. Ruby EG. 1996. LESSONS FROM A COOPERATIVE, BACTERIAL-ANIMAL  
649 ASSOCIATION: The *Vibrio fischeri*–*Euprymna scolopes* Light Organ Symbiosis.  
650 *Annu Rev Microbiol* 50:591–624.
- 651 8. Muñoz-Dorado J, Marcos-Torres FJ, García-Bravo E, Moraleda-Muñoz A, Pérez J.  
652 2016. *Myxobacteria*: Moving, killing, feeding, and surviving together. *Front*  
653 *Microbiol* 7:781.
- 654 9. Lopez D, Vlamakis H, Kolter R. 2008. Generation of multiple cell types in *Bacillus*  
655 *subtilis*. *FEMS Microbiol Rev* 33:152–163.
- 656 10. López D, Kolter R. 2010. Extracellular signals that define distinct and coexisting cell  
657 fates in *Bacillus subtilis*. *FEMS Microbiol Rev* 34:134–149.
- 658 11. Kovács ÁT, Dragoš A. 2019. Evolved Biofilm: Review on the Experimental  
659 Evolution Studies of *Bacillus subtilis* Pellicles. *J Mol Biol* in press.
- 660 12. Kearns DB, Chu F, Rudner R, Losick R. 2004. Genes governing swarming in  
661 *Bacillus subtilis* and evidence for a phase variation mechanism controlling surface

- 662 motility. *Mol Microbiol* 52:357–369.
- 663 13. Fujita M, González-Pastor JE, Losick R. 2005. High- and low-threshold genes in the  
664 Spo0A regulon of *Bacillus subtilis*. *J Bacteriol* 187:1357–1368.
- 665 14. Auchtung JM, Lee CA, Grossman AD. 2006. Modulation of the ComA-Dependent  
666 Quorum Response in *Bacillus subtilis* by Multiple Rap Proteins and Phr Peptides. *J*  
667 *Bacteriol* 188:5273–5285.
- 668 15. Mukai K, Kawata M, Tanaka T. 1990. Isolation and phosphorylation of the *Bacillus*  
669 *subtilis* *degS* and *degU* gene products. *J Biol Chem* 265:20000–20006.
- 670 16. Bassler BL, Losick R. 2006. Bacterially speaking. *Cell* 125:237–246.
- 671 17. Waters CM, Bassler BL. 2005. Quorum sensing: cell-to-cell communication in  
672 bacteria. *Annu Rev Cell Dev Biol* 21:319–346.
- 673 18. Williams P. 2007. Quorum sensing, communication and cross-kingdom signalling in  
674 the bacterial world. *Microbiology* 153:3923–3938.
- 675 19. Declerck N, Bouillaut L, Chaix D, Rugani N, Slamti L, Hoh F, Lereclus D, Arold ST.  
676 2007. Structure of PlcR: Insights into virulence regulation and evolution of quorum  
677 sensing in Gram-positive bacteria. *Proc Natl Acad Sci* 104:18490–18495.
- 678 20. Rocha-Estrada J, Aceves-Diez AE, Guarneros G, De La Torre M. 2010. The RNPP  
679 family of quorum-sensing proteins in Gram-positive bacteria. *Appl Microbiol*  
680 *Biotechnol* 87:913–923.
- 681 21. Neiditch MB, Capodagli GC, Prehna G, Federle MJ. 2017. Genetic and structural  
682 analyses of RRNPP intercellular peptide signaling of Gram-positive bacteria. *Annu*  
683 *Rev Genet* 51:311–333.
- 684 22. Pottathil M, Lazazzera BA. 2003. The extracellular Phr peptide–Rap phosphatase  
685 signaling circuit of *Bacillus subtilis*. *Front Biosci* 8:32–45.

- 686 23. Core L, Perego M. 2003. TPR-mediated interaction of RapC with ComA inhibits  
687 response regulator-DNA binding for competence development in *Bacillus subtilis*.  
688 Mol Microbiol 49:1509–1522.
- 689 24. Perego M. 1997. A peptide export-import control circuit modulating bacterial  
690 development regulates protein phosphatases of the phosphorelay. Proc Natl Acad Sci  
691 U S A 94:8612–8617.
- 692 25. Ogura M, Shimane K, Asai K, Ogasawara N, Tanaka T. 2003. Binding of response  
693 regulator DegU to the *aprE* promoter is inhibited by RapG, which is counteracted by  
694 extracellular PhrG in *Bacillus subtilis*. Mol Microbiol 49:1685–1697.
- 695 26. Solomon JM, Lazazzera BA, Grossman AD. 1996. Purification and characterization  
696 of an extracellular peptide factor that affects two different developmental pathways  
697 in *Bacillus subtilis*. Genes Dev 10:2014–2024.
- 698 27. Ogura M, Fujita Y. 2007. *Bacillus subtilis rapD*, a direct target of transcription  
699 repression by RghR, negatively regulates *srfA* expression. FEMS Microbiol Lett  
700 268:73–80.
- 701 28. Bongiorno C, Ishikawa S, Stephenson S, Ogasawara N, Perego M. 2005. Synergistic  
702 regulation of competence development in *Bacillus subtilis* by two Rap-Phr systems.  
703 J Bacteriol 187:4353–4361.
- 704 29. Hayashi K, Kensuke T, Kobayashi K, Ogasawara N, Ogura M. 2006. *Bacillus*  
705 *subtilis* RghR (YvaN) represses *rapG* and *rapH*, which encode inhibitors of  
706 expression of the *srfA* operon. Mol Microbiol 59:1714–1729.
- 707 30. Smits WK, Bongiorno C, Veening J-W, Hamoen LW, Kuipers OP, Perego M. 2007.  
708 Temporal separation of distinct differentiation pathways by a dual specificity Rap-  
709 Phr system in *Bacillus subtilis*. Mol Microbiol 65:103–120.

- 710 31. Boguslawski KM, Hill PA, Griffith KL. 2015. Novel mechanisms of controlling the  
711 activities of the transcription factors Spo0A and ComA by the plasmid-encoded  
712 quorum sensing regulators Rap60-Phr60 in *Bacillus subtilis*. *Mol Microbiol* 96:325–  
713 348.
- 714 32. Perego M, Hanstein C, Welsh KM, Djavakhishvili T, Glaser P, Hoch JA. 1994.  
715 Multiple protein-aspartate phosphatases provide a mechanism for the integration of  
716 diverse signals in the control of development in *B. subtilis*. *Cell* 79:1047–1055.
- 717 33. Jiang M, Grau R, Perego M. 2000. Differential processing of propeptide inhibitors of  
718 Rap phosphatases in *Bacillus subtilis*. *J Bacteriol* 182:303–310.
- 719 34. Parashar V, Mirouze N, Dubnau DA, Neiditch MB. 2011. Structural basis of  
720 response regulator dephosphorylation by Rap phosphatases. *PLoS Biol* 9:e1000589.
- 721 35. Parashar V, Jeffrey PD, Neiditch MB. 2013. Conformational Change-Induced  
722 Repeat Domain Expansion Regulates Rap Phosphatase Quorum-Sensing Signal  
723 Receptors. *PLoS Biol* 11:e1001512.
- 724 36. Burbulys D, Trach KA, Hoch JA. 1991. Initiation of Sporulation in *B. subtilis* is  
725 Controlled by a Multicomponent Phosphorelay. *Cell* 64:545–552.
- 726 37. Perego M. 2001. A new family of aspartyl phosphate phosphatases targeting the  
727 sporulation transcription factor Spo0A of *Bacillus subtilis*. *Mol Microbiol* 42:133–  
728 143.
- 729 38. Ehling-Schulz M, Koehler TM, Lereclus D. 2019. The *Bacillus cereus* Group:  
730 *Bacillus* species with Pathogenic Potential. *Microbiol Spectr* 6 GPP3-0032–2018.
- 731 39. Anderson I, Sorokin A, Kapatral V, Reznik G, Bhattacharya A, Mikhailova N, Burd  
732 H, Joukov V, Kaznadzey D, Walunas T, Souza MÕ, Larsen N, Pusch G, Liolios K,  
733 Grechkin Y, Lapidus A, Goltsman E, Chu L, Fonstein M, Ehrlich SD. 2005.

- 734 Comparative genome analysis of *Bacillus cereus* group genomes with *Bacillus*  
735 *subtilis*. FEMS Microbiol Lett 250:175–184.
- 736 40. Dubois T, Lemy C, Buisson C, Faegri K, Nielsen-Ieroux C, Gohar M, Jacques P,  
737 Ramarao N, Kolstø A. 2012. Necrotrophism is a quorum-sensing-regulated lifestyle  
738 in *Bacillus thuringiensis*. PLoS Pathog 8:e1002629.
- 739 41. Cabrera R, Rocha J, Flores V, Vázquez-Moreno L, Guarneros G, Olmedo G,  
740 Rodríguez-Romero A, de la Torre M. 2014. Regulation of sporulation initiation by  
741 NprR and its signaling peptide NprRB: molecular recognition and conformational  
742 changes. Appl Microbiol Biotechnol 98:9399–9412.
- 743 42. Cabrera R, Rodríguez-Romero A, Guarneros G, de la Torre M. 2016. New insights  
744 into the interaction between the quorum-sensing receptor NprR and its DNA target,  
745 or the response regulator Spo0F. FEBS Lett 590:3243–3253.
- 746 43. Rocha J, Flores V, Cabrera R, Soto-Guzmán A, Granados G, Juaristi E, Guarneros G,  
747 De La Torre M. 2012. Evolution and some functions of the NprR-NprRB quorum-  
748 sensing system in the *Bacillus cereus* group. Appl Microbiol Biotechnol 94:1069–  
749 1078.
- 750 44. Even-Tov E, Omer Bendori S, Pollak S, Eldar A. 2016. Transient Duplication-  
751 Dependent Divergence and Horizontal Transfer Underlie the Evolutionary Dynamics  
752 of Bacterial Cell-Cell Signaling. PLoS Biol 14:1–23.
- 753 45. Bongiorno C, Stoessel R, Shoemaker D, Perego M. 2006. Rap Phosphatase of  
754 Virulence Plasmid pXO1 Inhibits *Bacillus anthracis* Sporulation. J Bacteriol  
755 188:487–498.
- 756 46. Fazion F, Perchat S, Buisson C, Vilas-Bôas G, Lereclus D. 2018. A plasmid-borne  
757 Rap-Phr system regulates sporulation of *Bacillus thuringiensis* in insect larvae.



- 758 Environ Microbiol 20:145–155.
- 759 47. Slamti L, Perchat S, Huillet E, Lereclus D. 2014. Quorum sensing in *Bacillus*  
760 *thuringiensis* is required for completion of a full infectious cycle in the insect.  
761 Toxins (Basel) 6:2239–2255.
- 762 48. Cardoso P de F, Perchat S, Vilas-Boas LA, Lereclus D, Vilas-Bôas GT. 2019.  
763 Diversity of the Rap–Phr quorum-sensing systems in the *Bacillus cereus* group. Curr  
764 Genet 1–15.
- 765 49. Flemming HC, Wuertz S. 2019. Bacteria and archaea on Earth and their abundance  
766 in biofilms. Nat Rev Microbiol 17:247–260.
- 767 50. Bhavsar AP, Zhao X, Brown ED. 2001. Development and characterization of a  
768 xylose-dependent system for expression of cloned genes in *Bacillus subtilis*:  
769 Conditional complementation of a teichoic acid mutant. Appl Environ Microbiol  
770 67:403–410.
- 771 51. Kinsinger RF, Shirk MC, Fall R. 2003. Rapid surface motility in *Bacillus subtilis* is  
772 dependent on extracellular surfactin and potassium ion. J Bacteriol 185:5627–5631.
- 773 52. Kearns DB. 2010. A field guide to bacterial swarming motility. Nat Rev Microbiol  
774 8:634–644.
- 775 53. Hölscher T, Kovács ÁT. 2017. Sliding on the surface: bacterial spreading without an  
776 active motor. Environ Microbiol 19:2537–2545.
- 777 54. Fagerlund A, Dubois T, Økstad OA, Verplaetse E, Gilois N, Bennaceur I, Perchat S,  
778 Gominet M, Aymerich S, Kolstø AB, Lereclus D, Gohar M. 2014. SinR controls  
779 enterotoxin expression in *Bacillus thuringiensis* biofilms. PLoS One 9:e87532.
- 780 55. Raynor MJ, Roh JH, Widen SG, Wood TG, Koehler TM. 2018. Regulons and  
781 protein–protein interactions of PRD-containing *Bacillus anthracis* virulence

- 782 regulators reveal overlapping but distinct functions. *Mol Microbiol* 109:1–22.
- 783 56. Even-Tov E, Omer Bendori S, Valastyan J, Ke X, Pollak S, Bareia T, Ben-Zion I,  
784 Bassler BL, Eldar A. 2016. Social Evolution Selects for Redundancy in Bacterial  
785 Quorum Sensing. *PLoS Biol* 14:e1002386.
- 786 57. Dubnau EJ, Carabetta VJ, Tanner AW, Miras M, Diethmaier C, Dubnau D. 2016. A  
787 protein complex supports the production of Spo0A-P and plays additional roles for  
788 biofilms and the K-state in *Bacillus subtilis*. *Mol Microbiol* 101:606–624.
- 789 58. Earl AM, Losick R, Kolter R. 2008. Ecology and genomics of *Bacillus subtilis*.  
790 *Trends Microbiol* 16:269–275.
- 791 59. Mirouze N, Dubnau D. 2013. Chance and Necessity in *Bacillus subtilis*  
792 Development. *Microbiol Spectr* 1:TBS-0004-2012.
- 793 60. Argôlo-Filho RC, Loguercio LL. 2014. *Bacillus thuringiensis* is an environmental  
794 pathogen and host-specificity has developed as an adaptation to human-generated  
795 ecological niches. *Insects* 5:62–91.
- 796 61. Perchat S, Dubois T, Zouhir S, Gominet M, Poncet S, Lemy C, Aumont-Nicaise M,  
797 Deutscher J, Gohar M, Nessler S, Lereclus D. 2011. A cell-cell communication  
798 system regulates protease production during sporulation in bacteria of the *Bacillus*  
799 *cereus* group. *Mol Microbiol* 82:619–633.
- 800 62. Perego M, Brannigan JA. 2001. Pentapeptide regulation of aspartyl-phosphate  
801 phosphatases. *Peptides* 22:1541–1547.
- 802 63. Stephenson S, Mueller C, Jiang M, Perego M. 2003. Molecular analysis of Phr  
803 peptide processing in *Bacillus subtilis*. *J Bacteriol* 185:4861–4871.
- 804 64. Miller EL, Kjos M, Abrudan MI, Roberts IS, Veening JW, Rozen DE. 2018.  
805 Eavesdropping and crosstalk between secreted quorum sensing peptide signals that

- 806 regulate bacteriocin production in *Streptococcus pneumoniae*. ISME J 12:2363–2375.
- 807 65. Fleuchot B, Guillot A, Mézange C, Besset C, Chambellon E, Monnet V, Gardan R.  
808 2013. Rgg-Associated SHP Signaling Peptides Mediate Cross-Talk in *Streptococci*.  
809 PLoS One 8:e66042.
- 810 66. Zhang F, Kwan A, Xu A, Süel GM. 2015. A synthetic quorum sensing system  
811 reveals a potential private benefit for public good production in a biofilm. PLoS One  
812 10:e0132948.
- 813 67. Geddes BA, Paramasivan P, Joffrin A, Thompson AL, Christensen K, Jorin B, Brett  
814 P, Conway SJ, Oldroyd GED, Poole PS. 2019. Engineering transkingdom signalling  
815 in plants to control gene expression in rhizosphere bacteria. Nat Commun 10:3430.
- 816 68. Sheppard AE, Poehlein A, Rosenstiel P, Liesegang H, Schulenburg H. 2013.  
817 Complete genome sequence of *Bacillus thuringiensis* strain 407 Cry-. Genome  
818 Announc 1:e00158-12.
- 819 69. Maniatis T, Fritsch EF, Sambrook J. 1988. Molecular Cloning : a laboratory manual.  
820 2nd edition. Cold Spring Harb, New York.
- 821 70. Grandvalet C, Gominet M, Lereclus D. 2001. Identification of genes involved in the  
822 activation of the *Bacillus thuringiensis inhA* metalloprotease gene at the onset of  
823 sporulation. Microbiology 147:1805–1813.
- 824 71. Altschul SF, Gish W, Miller W, Myers EW, Lipman DJ. 1990. Basic local alignment  
825 search tool. J Mol Biol 215:403–410.
- 826 72. Katoh K, Rozewicki J, Yamada KD. 2017. MAFFT online service: multiple  
827 sequence alignment, interactive sequence choice and visualization. Brief Bioinform  
828 in press.
- 829 73. Katoh K, Kuma KI, Toh H, Miyata T. 2005. MAFFT version 5: Improvement in

- 830 accuracy of multiple sequence alignment. *Nucleic Acids Res* 33:511–518.
- 831 74. Arantes O, Lereclus D. 1991. Construction of Cloning Vectors for *Bacillus*  
832 *thuringiensis*. *Gene* 108:115–119.
- 833 75. Marchler-Bauer A, Bo Y, Han L, He J, Lanczycki CJ, Lu S, Chitsaz F, Derbyshire  
834 MK, Geer RC, Gonzales NR, Gwadz M, Hurwitz DI, Lu F, Marchler GH, Song JS,  
835 Thanki N, Wang Z, Yamashita RA, Zhang D, Zheng C, Geer LY, Bryant SH. 2016.  
836 CDD/SPARCLE: functional classification of proteins via subfamily domain  
837 architectures. *Nucleic Acids Res* 45:D200–D203.
- 838 76. Guindon S, Dufayard JF, Lefort V, Anisimova M, Hordijk W, Gascuel O. 2010.  
839 New algorithms and methods to estimate maximum-likelihood phylogenies:  
840 Assessing the performance of PhyML 3.0. *Syst Biol* 59:307-321.
- 841 77. Lefort V, Longueville JE, Gascuel O. 2017. SMS: Smart Model Selection in PhyML.  
842 *Mol Biol Evol* 34:2422-2424.
- 843 78. Nielsen H. 2017. Predicting secretory proteins with SignalP Protein Function  
844 Prediction. Humana Press, New York, NY.
- 845 79. Larkin MA, Blackshields G, Brown NP, Chenna R, McGettigan PA, McWilliam H,  
846 Valentin F, Wallace IM, Wilm A, Lopez R, Thompson JD, Gibson TJ, Higgins DG.  
847 2007. Clustal W and Clustal X version 2.0. *Bioinformatics* 23:2947–2948.
- 848 80. Thomsen MCF, Nielsen M. 2012. Seq2Logo: a method for construction and  
849 visualization of amino acid binding motifs and sequence profiles including sequence  
850 weighting, pseudo counts and two-sided representation of amino acid enrichment  
851 and depletion. *Nucleic Acids Res* 40:W281–W287.
- 852
- 853

854 **Tables**

855 **Table 1.** Rap-Phr systems encoded in *B. subtilis* 168 and in species from the *B. cereus*

856 group.

| Specie                                    | Number of Rap-<br>Phr systems | Location   |         |
|-------------------------------------------|-------------------------------|------------|---------|
|                                           |                               | Chromosome | Plasmid |
| <i>Bacillus subtilis</i> 168              | 12                            | 11         | 1       |
| <i>Bacillus cereus</i> ATCC 14579         | 5                             | 5          | 0       |
| <i>Bacillus anthracis</i> str. A0248      | 6                             | 5          | 1       |
| <i>Bacillus thuringiensis</i> 407         | 8                             | 4          | 4       |
| <i>Bacillus mycoides</i> ATCC 6442        | 5                             | 4          | 1       |
| <i>Bacillus pseudomycooides</i> DMS 12442 | 8                             | 8          | 0       |
| <i>Bacillus cytotoxicus</i> NVH 391-98    | 8                             | 8          | 0       |

857

858

859 **Figures**

860

861 **Figure 1**

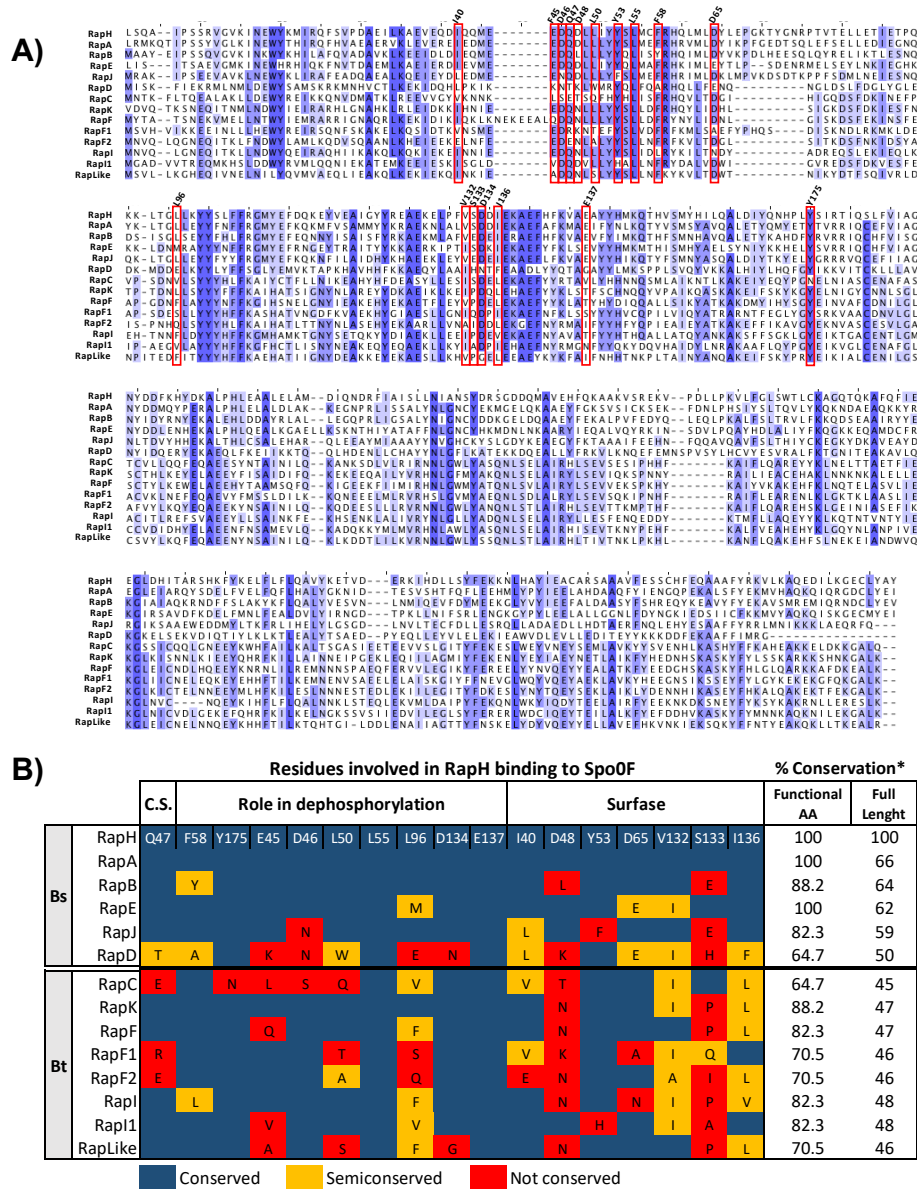

862

863 **Figure 1.** Prediction of the capacity of Rap proteins from Bt8741 to bind to

864 dephosphorylate Spo0F. A) Multiple sequence alignment of the complete amino acid

865 sequences of RapH, A, B, E, J and RapD from *B. subtilis* 168, and eight Rap proteins from

866 Bt8741. Blue highlights indicate highly conserved amino acids. Residues involved in the  
867 RapH-Spo0F binding are indicated in red rectangles and its position in RapH is shown on  
868 top of the alignment. B) Conservation of residues involved in RapH binding to Spo0F.  
869 Residues were considered as semiconserved when a functional amino acid of RapH was  
870 substituted with another amino acid with similar characteristics. Bs, *Bacillus subtilis* 168;  
871 Bt, *Bacillus thuringiensis* 407; C.S., Catalytic Site; \*Percentage of conserved and  
872 semiconserved amino acids in pairwise alignment to RapH.  
873  
874

875 **Figure 2**

876

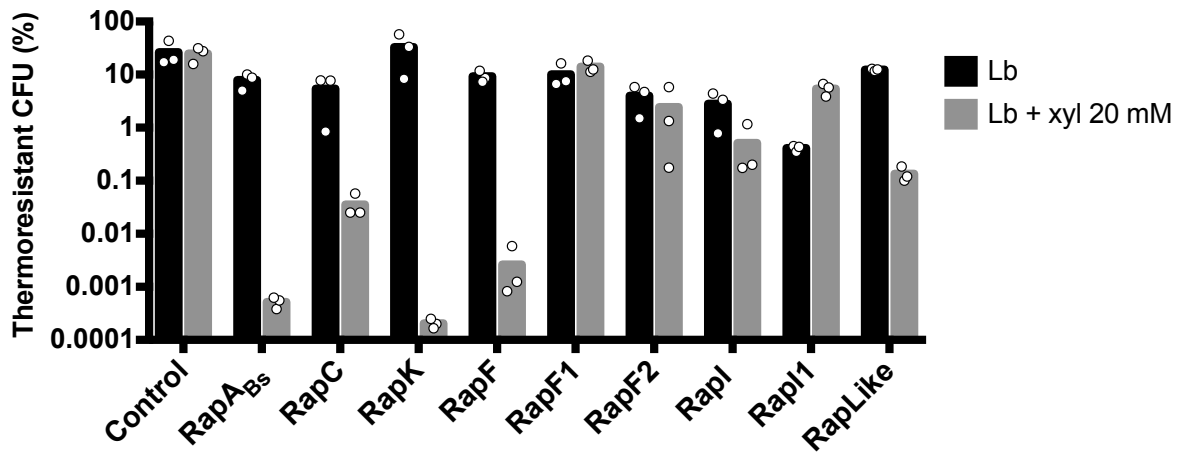

877

878 **Figure 2.** Sporulation efficiency of Bt8741 carrying overexpression plasmids for Rap

879 proteins, with and without addition of inducer. In the cases where thermoresistant CFU

880 were undetectable, we considered a value of 166 spores/ml, which is the detection limit for

881 this assay. Columns represent average of three individual measurements, shown as dots.

882



883 **Figure 3**

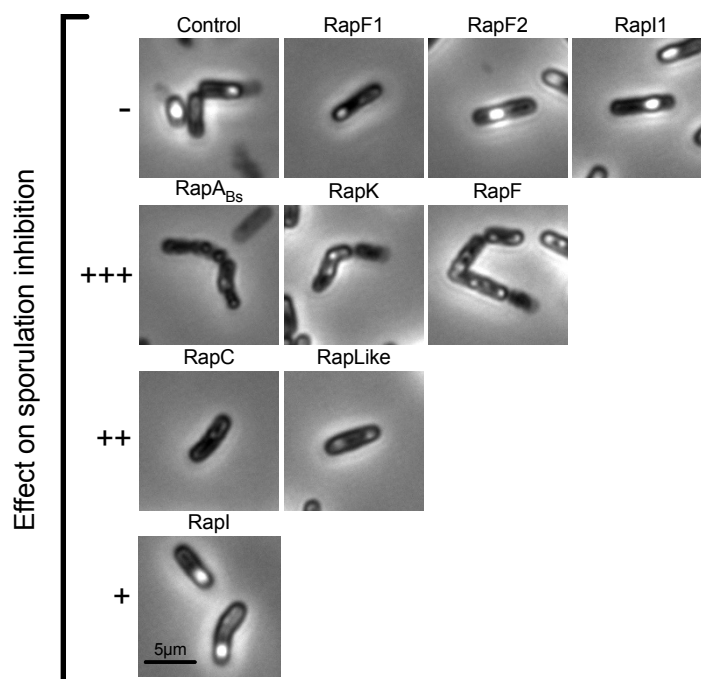

884

885 **Figure 3.** Cell morphology of strains with induced Rap protein overexpression at 72 h.

886 Phase contrast microscopy 63X and 1.8X magnification. -, no effect; +, decrease under 10-

887 fold; decrease between 90 and 160-fold; +++, decrease >1,000-fold.

888

889

890 **Figure 4**

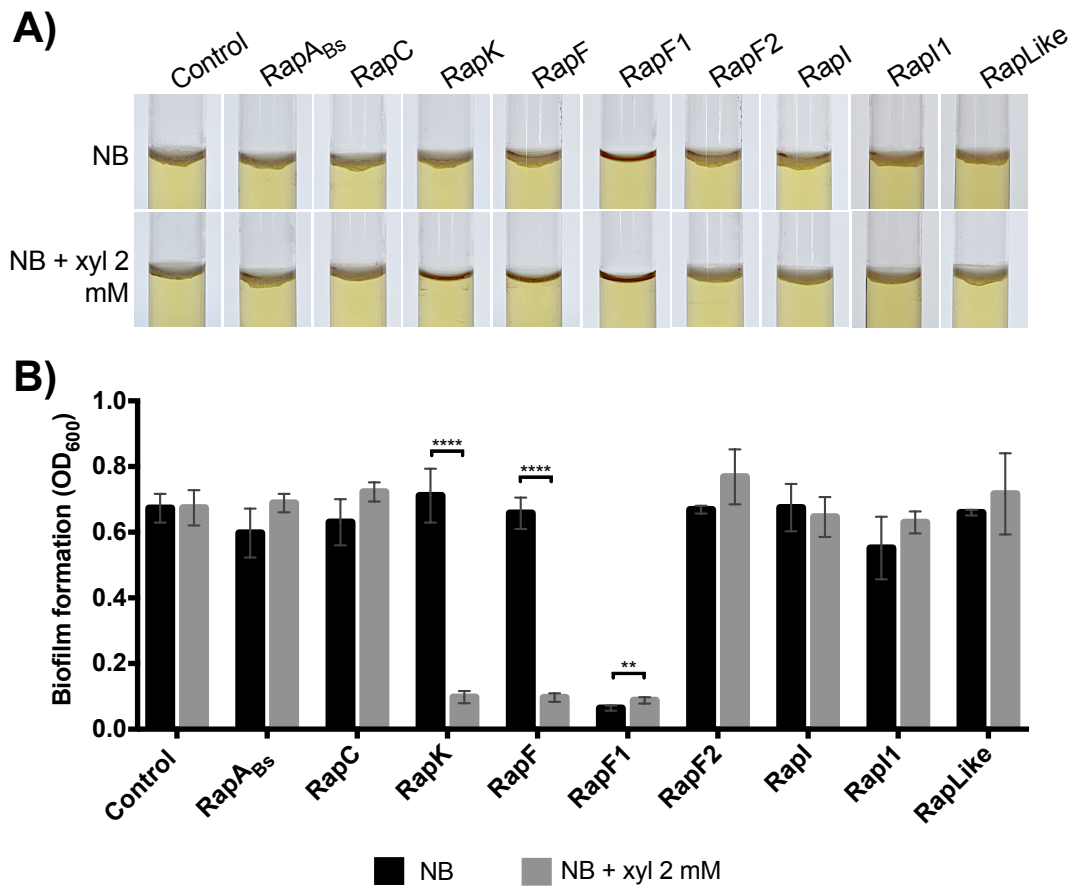

891

892 **Figure 4.** Biofilm formation of Rap-overexpression strains at 48 h. A) Biofilms formed in  
893 the liquid-air interphase in 13 x 100 mm glass tubes at 48 h. Biofilms are identified as a  
894 white layer on the surface. B) Biofilm formation quantification of Rap-overexpression  
895 strains in induced and not induced media after 48 h. Columns represent average of 5  
896 replicates  $\pm$  SD. NB, Nutrient Broth; \*\*,  $p < 0.005$ ; \*\*\*\*,  $p < 0.0001$ .

897

898 **Figure 5**

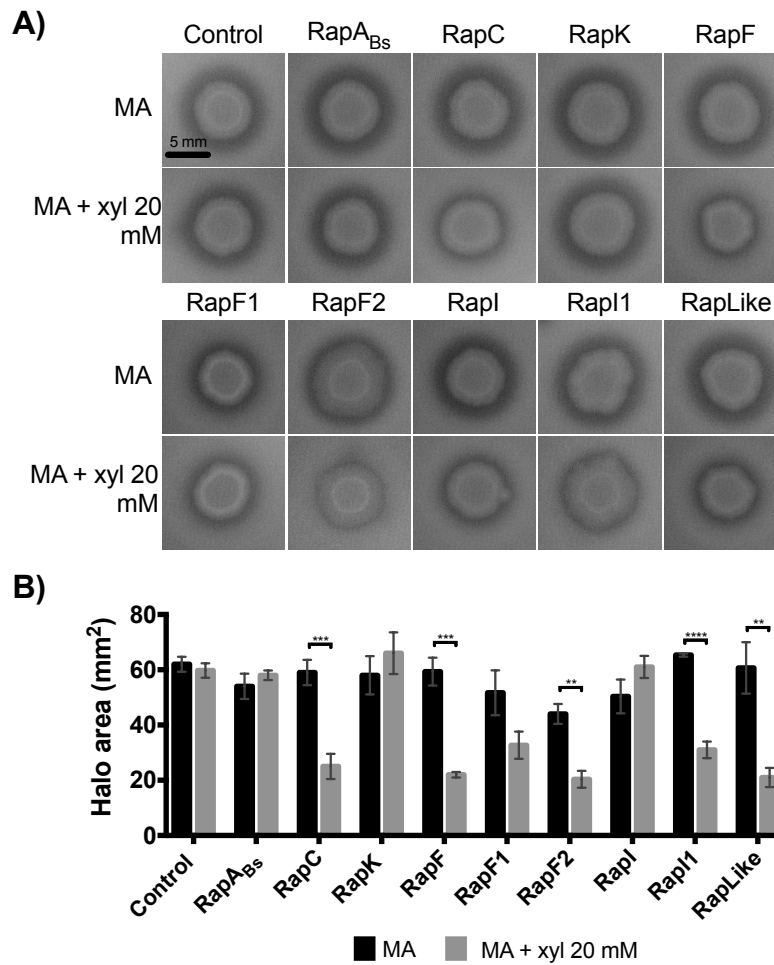

899

900 **Figure 5.** Extracellular proteolytic activity of Rap-overexpression strains. A) Effect of Rap

901 protein overexpression in the hydrolysis halo of Rap-overexpression strains colonies. B)

902 Hydrolysis halo area with and without Rap-overexpression induction. Columns represent

903 average of 3 replicates  $\pm$  SD. MA, milk agar; \*\*,  $p < 0.005$ ; \*\*\*,  $p < 0.0005$ ; \*\*\*\*,  $p < 0.0001$ .

904

905

906 **Figure 6**

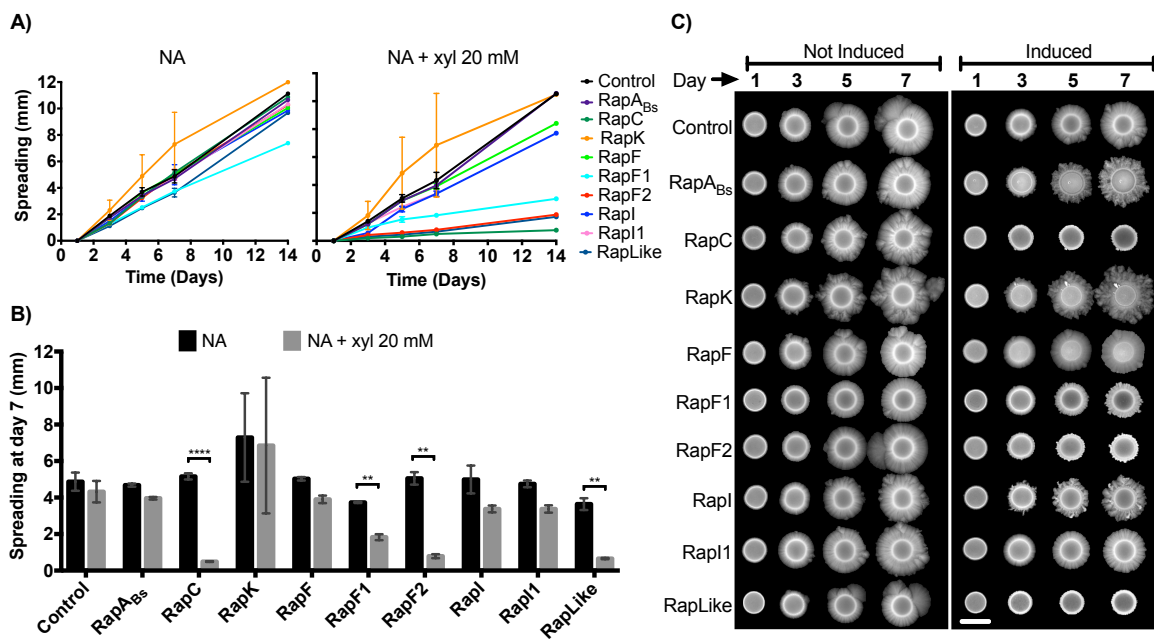

907

908 **Figure 6.** Spreading phenotype of Rap-overexpression strains. A) Spreading kinetics of  
 909 Rap-overexpression colonies on agar. Each point represents the media of triplicates ± SD;  
 910 only one data point is shown at day 14. B) Spreading quantification of Rap-overexpression  
 911 colonies at day 7. Columns represent average of triplicates ± SD. C) Pictures of  
 912 representative Rap-overexpression strains spreading during 7 days. Scale bar indicates 5  
 913 mm. NA, Nutrient Agar; \*\*, p<0.005; \*\*\*\*, p<0.0001.

914

915

916 **Figure 7**

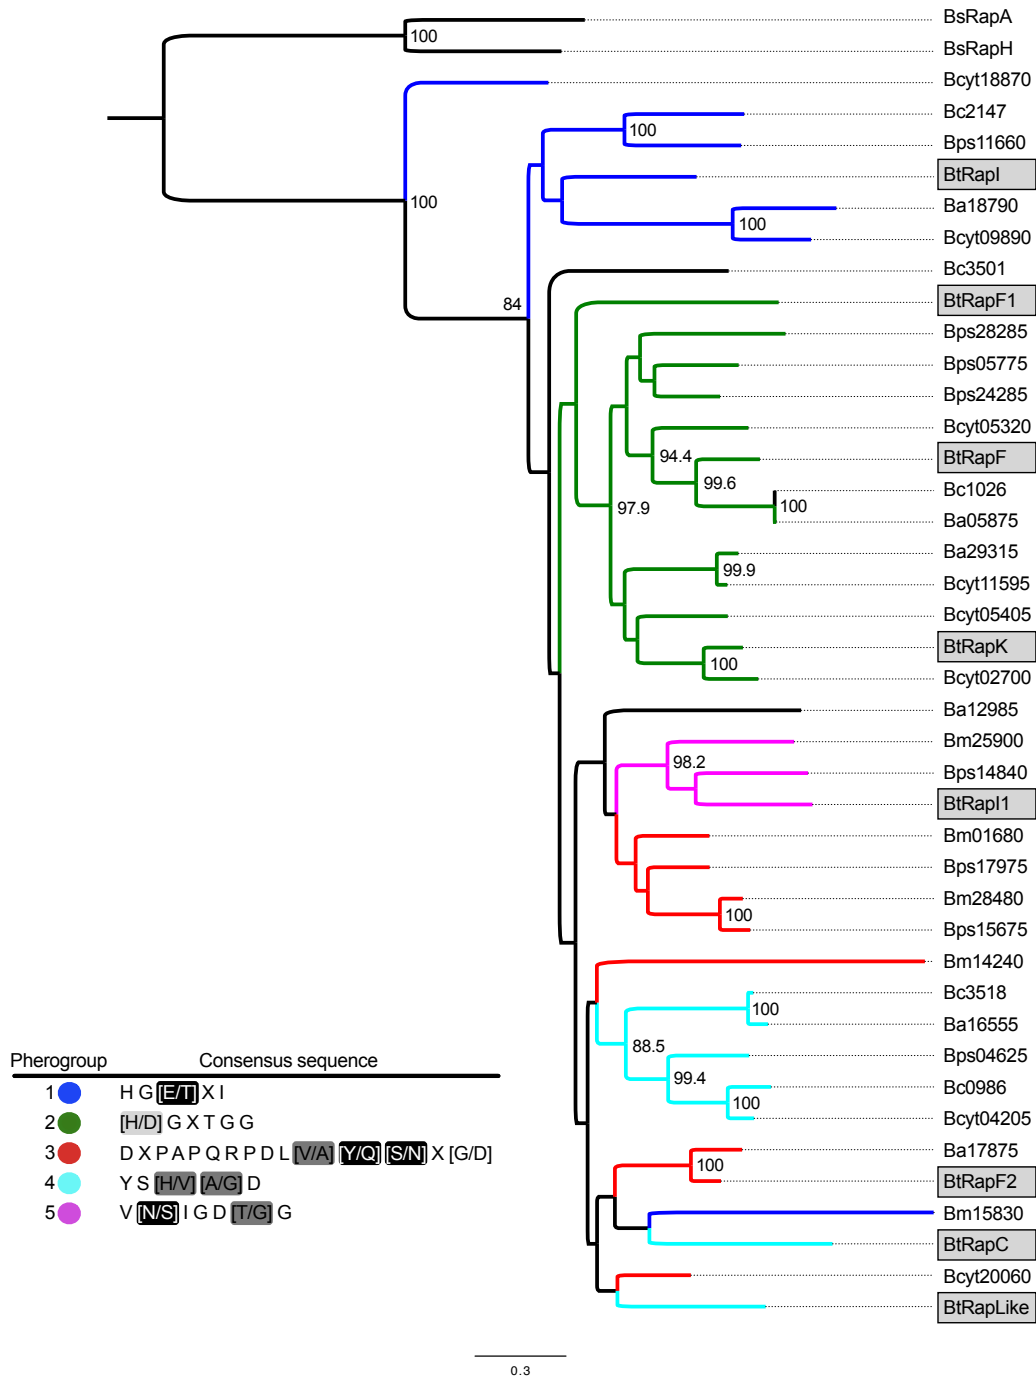

917

918 **Figure 7.** Maximum likelihood phylogeny of Rap proteins from the *B. cereus* group. Rap

919 proteins from Bt8741 are highlighted in gray boxes. Branches from each pherogroup are

920 identified in colors. Bootstraps higher than 80% are shown in each node. Insert table:

921 pherogroups and consensus sequences of mature Phr. Semiconservations in the consensus  
922 sequences are highlighted: black, polar residues; gray, hydrophobic residues; silver, polar  
923 and charged residues.
